1 Effects of pen enrichment on leg health of fast and slower-growing broiler chickens

2

3 Bahadır Can Güz,<sup>1,\*</sup> Ingrid C. de Jong,<sup>2</sup> Carol Souza Da Silva,<sup>2</sup> Fleur Veldkamp,<sup>1</sup> Bas Kemp,<sup>1</sup>

4 Roos Molenaar<sup>1</sup> and Henry van den Brand<sup>1</sup>

5

6 <sup>1</sup> Adaptation Physiology Group, Wageningen University and Research, 6700AH, Wageningen,

7 Gelderland, The Netherlands

8 <sup>2</sup> Wageningen Livestock Research, Wageningen University and Research, 6700AH, Wageningen,

9 Gelderland, The Netherlands

10

11

12

13 \* Corresponding author

14 Email: [bahadir.guz@wur.nl](mailto:bahadir.guz@wur.nl)

## 15 **Abstract**

16 Pen enrichment for broiler (meat-type) chickens is one of the potential strategies to stimulate  
17 locomotion and consequently contribute to leg health and welfare. This study was designed to  
18 evaluate effects of using a plethora of pen enrichments (barrier perches, angular ramps, horizontal  
19 platforms, large distance between feed and water and providing live Black Soldier fly larvae in a  
20 dustbathing area) on tibia characteristics, locomotion, leg health and home pen behaviour of fast and  
21 slower-growing broiler chickens. The experiment was set up as a 2 x 2 factorial arrangement with a  
22 total of 840 male broiler chickens in a complete randomized design (7 replicates per treatment and 30  
23 chickens per replicate) with the following treatments: 1) pen enrichment (enriched pen or non-  
24 enriched pen); 2) broiler strain (fast-growing Ross 308 or slower-growing Hubbard JA 757). Home  
25 pen behaviour and use of enrichment were observed. At approximately 1400 and 2200 gram body  
26 weight, two chickens per pen were randomly selected and slaughtered, to investigate tibia  
27 morphological, biophysical and mechanical characteristics and leg health. Pen enrichment positively  
28 affected tibia biophysical characteristics, e.g., osseous volume ( $\Delta=1.8 \text{ cm}^3$ ,  $P=0.003$ ), total volume  
29 ( $\Delta=1.4 \text{ cm}^3$ ,  $P=0.03$ ) and volume fraction ( $\Delta=0.02 \%$ ,  $P=0.002$ ), in both fast and slower-growing  
30 chickens, suggesting that pen enrichment particularly affects ossification and mineralization  
31 mechanisms. Accordingly, locomotion and active behaviours were positively influenced by pen  
32 enrichment. However, pen enrichment resulted in lower body weight gain in both strains, which might  
33 be due to higher activity or lower feed intake as a result of difficulties of crossing the barrier perches.  
34 Regarding the strain, slower-growing chickens showed consistently more advanced tibia  
35 characteristics and more active behaviour than fast-growing chickens. It can be concluded that pen  
36 enrichment may lead to more activity and better bone development in both fast and slower-growing  
37 chickens.

38

## 39 **Introduction**

40 In the last decades, genetic selection on growth rate and feed efficiency in broiler (meat-type)  
41 chickens resulted in significant phenotypic and genotypic changes [1,2,3,4]. Despite the fact that this  
42 selection has provided numerous advantages e.g., high amount of meat production in a short rearing  
43 duration, less environmental pollution and considerable financial benefits for producers, it has also  
44 caused some downsides e.g., suboptimal leg health. Suboptimal leg health appears to be related to an  
45 imbalance between high growth rate and immature bones and joints [2,5,6,7,8], which can lead to  
46 impaired locomotion [2,6,8,9], pain [8,10], poor welfare [8,11,12,13], higher mortality, lower  
47 slaughter revenues and significant financial losses [2,14,15,16,17].

48 A potential strategy to promote leg health and welfare of modern broiler chickens might be to  
49 stimulate activity and locomotion, e.g., by pen enrichment [18,19,20,21]. Chickens have been using  
50 natural perches, platforms, ramps and elevated resting areas as their natural behaviour throughout  
51 their history, from wild ancestors to their modern generations [21,22,23]. This suggests that these  
52 types of enrichments are important to fulfil natural behaviors, but current broiler houses mostly lack  
53 any form of enrichment. Several studies assessing behaviour showed that broiler chickens spend  
54 approximately 80% of their lifespan with passive behaviours (e.g., lying, sitting and resting)  
55 [4,18,24]. The lack of activity, together with a fast growth rate, may impair bone development, which  
56 can result in suboptimal leg health or even lameness [12,18,25,26,27]. It has been shown that a lower  
57 stocking density [21,28,29,30,31], placing platforms and/or ramps [21,23,32,33], perches [31,32],  
58 large distance between feed and water [18,33,34], different dustbathing materials, such as moss-peat  
59 [35], and worms or insects in a dustbathing area [36,37] resulted in lower prevalence of leg disorders  
60 and lower mortality rate, although we did not find this in an earlier comparable study [38]. Increasing  
61 physical activity and locomotion may thus result in lower incidence of leg problems by stimulating  
62 tibia morphological, biophysical and mechanical properties [18,33,39,40,41].

63 Another potential strategy to promote leg health and welfare is to reduce growth rate of broiler  
64 chickens. Fast-growing broiler chickens demonstrate more leg and locomotion problems than slower-  
65 growing broiler chickens [14,42,43]. The underlying reason is that fast-growing broiler chickens have  
66 more porous and less mineralised bones than slower-growing broiler chickens, which are less able to  
67 carry the rapidly increased body weight [44,45]. It has been found that slower-growing broiler  
68 chickens spent more time on perches and platforms [46,47], demonstrated better locomotion  
69 [24,26,46,48,49,50], had less hock and leg problems [46,51] and lower mortality [52] than fast-  
70 growing broiler chickens.

71 It can be hypothesized that pen enrichment positively affects bone development and  
72 locomotion in both fast and slower-growing broiler chickens, but that effects might be larger in the  
73 fast-growing broiler chickens, because they generally show less locomotion. However, effects of pen  
74 enrichment on locomotion and leg problems in slower-growing broiler chickens are hardly  
75 investigated.

76 The aim of this study was to investigate effects of a combination of different forms of pen  
77 enrichment on tibia characteristics, locomotion, leg health and home pen behaviour of both fast and  
78 slower-growing broiler chickens.

## 79 **Materials and methods**

### 80 **Experimental Design**

81 The experiment was setup as a 2 x 2 factorial arrangement with two strains of broiler chickens  
82 (fast-growing or slower-growing) and two different levels of pen enrichment (enriched or non-  
83 enriched). A total of 28 pens (7 pens per treatment, each containing 30 male broiler chickens) within  
84 a complete randomized design was used. Fast-growing broiler chickens were reared till day 38 of age,  
85 whereas slower-growing broiler chickens were reared till day 49 of age. The experiment was  
86 conducted at the research accommodation of Wageningen Bioveterinary Research (Lelystad, The

87 Netherlands). All procedures in this study were approved by the Central Commission on Animal  
88 Experiments (The Hague, The Netherlands; approval number: 2016.D-0138.006).

## 89 **Animals, Rearing and Housing Management**

90 A total of 420 fast-growing (Ross 308, breeder age of 30 weeks) and 420 slower-growing  
91 (Hubbard JA 757; breeder age of 28 weeks) day-old male broiler chickens were obtained from a  
92 commercial hatchery (Probroed, Groenlo, The Netherlands) and randomly allocated to 28 pens in one  
93 broiler house. Half of the chickens per broiler strain were placed in enriched pens, while the other  
94 half was placed in non-enriched pens, resulting in the following treatments: enriched fast (**EF**), non-  
95 enriched fast (**NF**), enriched slower (**ES**) and non-enriched slower (**NS**). Pen size of both enriched  
96 and non-enriched pens was 3 x 1 m and floors in all pens were covered with wood shavings as bedding  
97 material. Enriched pens contained two wooden platforms (100 x 20 x 40 cm, one at each long side of  
98 the pen), two wooden ramps (200 x 20 cm, angle of 11.5°), a dust bathing area in the centre of the  
99 pen (100 x 100 cm) with peat moss (with a thickness of 2 cm in week 1, 4 cm in week 2, and 7.5 cm  
100 from week 3 onwards), two vertical wooden barrier perches (100 x 4 cm, adjustable in height from 4  
101 to 16 cm with steps of 4 cm at days 7, 14 and 21), a maximum distance (3 m) between feeders and  
102 drinkers and provision of live Black Soldier fly larvae (**BSFL**) in the substrate of the dust bathing  
103 area (once daily between 11:00 and 11:15 h). The amount of BSFL was determined daily, based on  
104 5% of the expected feed intake, except during the first 7 days, where chickens received a higher level  
105 of BSFL (10% on days 0 – 1, 15% on days 2 – 4 and 10% on days 5 – 7). The reason for using higher  
106 percentages in these 7 days is related to the number of larvae available for each chicken. With the  
107 low feed intake in this phase, only one or two larvae would have been available per chicken in case  
108 only 5% BSFL was provided. Non-enriched pens included feed and water (at 1 m distance) and one  
109 single long perch (300 x 4 cm, not adjustable in height). Illustrations of the enriched and non-enriched  
110 pens are provided in Fig 1.

111

112 **Fig 1. Illustrations of non-enriched (top) and enriched (bottom) pens.** Non-enriched pens (3 x 1  
113 m) contained a short distance (1 m) between feeders and drinkers placed on opposite long walls, had  
114 one non-adjustable perch and the pen was covered with wood shavings as a bedding material.  
115 Enriched pens (3 x 1 m) contained two wooden platforms (A; 100 x 20 x 40 cm, one at each long side  
116 of the pen), two wooden ramps (B; 200 x 20 cm, angle of 11.5°), two vertical wooden barrier perches  
117 (C; 100 x 4 cm, adjustable in height from 4-16 cm with steps of 4 cm at days 7, 14 and 21), dust  
118 bathing area (D; 100 x 100 cm) with peat moss (with depth of 2 cm in week 1, 4 cm in week 2, and  
119 7.5 cm from week 3 onward), provision of live Black Soldier fly larvae (BSFL) in the substrate of the  
120 dust bathing area (E; once daily between 11:00 and 11:15 h) and a large distance (3 m) between  
121 feeders and drinkers placed on opposite short walls (F). The floor outside the dust bathing area was  
122 covered with wood shavings as a bedding material.

123  
124 At day 0 (placement), all broilers were provided with a neck tag for individual identification.  
125 House temperature was maintained at 34°C at day 0 and gradually decreased to a constant temperature  
126 of 18°C at 40 days of age. Relative humidity was kept between 60% and 80% from 1-7 days of age  
127 and between 40% and 60% thereafter. The lighting program used was 24L:0D (day 0), 20L:4D (day  
128 1 to 6) and 18L:6D (from day 7 onward, with a continuous dark period during night). At day 0,  
129 chickens were vaccinated against infectious bronchitis (eye drop; MSD Animal Health, Boxmeer,  
130 The Netherlands) and at day 11, against Newcastle disease (Clone 30; eye drop, MSD Animal Health,  
131 Boxmeer, The Netherlands).

132 Feed and water were provided *ad libitum* for all treatments throughout the whole experiment.  
133 A 3-phase feeding program was applied; starter diets were provided from day 0 to 14 (ME=2925  
134 kcal/kg, CP=203 g/kg, dLys=11.1 g/kg), grower diets from day 14 to 35 (ME=2975 kcal/kg, CP=171  
135 g/kg, dLys=9.1 g/kg) and finisher diets from day 35 to 38 (for fast-growing chickens) or 35 to 49 (for  
136 slower-growing chickens) (ME=3025 kcal/kg, CP=165 g/kg, dLys=8.6 g/kg). Coccidiostats (70 g/kg

137 salinomycin) were added to the grower diet. A protein-fat mixture, with a comparable composition  
138 as the BSFL, was added to the diet of the non-enriched pens once daily to achieve similar energy and  
139 nutrient intake as the broilers in the enriched pens (which received BSFL).

## 140 **Data Collection, Sampling and Measurements**

141 All chickens were individually weighed on day 0, 7, 14, 21, 28, 35, 42, and 49 of age. Feed  
142 intake (**FI**) was determined per pen at the same days. Body weight (**BW**), FI and feed conversion  
143 ratio (**FCR**) were calculated for the three phases and over the whole growing period, taking mortality  
144 into account. FI was calculated without BSFL intake of chickens in enriched pens and by excluding  
145 the intake of the protein-fat mixture of chickens in non-enriched pens. Mortality was recorded per  
146 pen per day. Home pen behaviour (all chickens per pen) and use of enrichment (all chickens per pen  
147 in enriched pens) were scored by direct observation of one observer, using instantaneous scan  
148 sampling [53] at day 8, 22, 29 and 43. At these days, broilers were observed in their home pen at four  
149 moments (8:30, 10:30, 13:00 and 15:00 h). On day 43, only slower-growing chickens were present.  
150 Per scan per day per pen, behaviour of all chickens was scored during 3 to 4 min. The number of  
151 chickens performing the following behaviours was scored: eating, drinking, walking, standing,  
152 sitting, comfort behaviour, foraging, dustbathing, ground pecking, aggression and others. Others was  
153 defined as chickens demonstrating a behaviour other than all other behaviours described above. After  
154 observing the behaviour in a pen, the number of chickens performing the following activities was  
155 scored for use of enrichment: chickens on platforms and ramps, chickens under platforms and ramps,  
156 dustbathing chickens and chickens perching on barrier.

157 Gait score of 4 randomly selected chickens per pen was evaluated on day 27 (fast-growing  
158 chickens) and day 35 (slower-growing chickens), to eliminate BW difference. Gait was scored within  
159 a range of 0 (normal locomotion) to 5 (unable to walk) [54].

160 At day 29 and 38, two fast-growing chickens per pen were selected for slaughtering with an  
161 average body weight of 1400 and 2200 gram, respectively, whereas at day 38 and 49, two slower-

162 growing chickens per pen were selected for slaughtering with the same body weights. Chickens were  
163 subjected to electrical stunning for euthanizing. Then, Varus-Valgus (**VV**) was scored, after fixating  
164 the legs at the hip joint to stretch the leg, by determining the angle between the tibia and the metatarsus  
165 for both the left (**VV<sup>L</sup>**) and right leg (**VV<sup>R</sup>**), using a goniometer. Thereafter, the left leg of each  
166 chicken was dissected and assessed by a veterinarian on tibia dyschondroplasia (**TD**), bacterial  
167 chondronecrosis with osteomyelitis (**BCO**), epiphyseal plate abnormalities (**EPA**), and  
168 epiphysiolysis (**EPI**). All these leg disorders were scored in the range of 0 (no abnormalities), 1  
169 (minor abnormality) or 2 (severe abnormality).

170 Right legs were deboned and tibias were packed and frozen at -20°C. After thawing, tibia  
171 weight was determined. Tibia proximal length, lateral cortex thickness, femoral and metatarsal side  
172 proximal head thickness, osseous volume, pore volume, total volume (osseous volume + pore  
173 volume), volume fraction (osseous volume / total volume), mineral content and mineral density were  
174 analysed on individual tibia, using a GE Phoenix 3D X-ray microfocus CT scanner (General Electric  
175 Company<sup>®</sup>, Boston, Massachusetts, US); for details see [55,56]. Illustrations of scanned bones are  
176 provided in Fig 2. Robusticity index was calculated using the following formula [57]:

177 
$$\text{Robusticity index (cm/g)} = \text{bone proximal length (cm)} / \text{bone weight (g)}.$$

178

179 **Fig 2. Illustrations of scanned bone by GE Phoenix 3D X-ray microfocus CT scanner visualized**  
180 **in Avizo 3D viewer software.** A) Two-dimensional black and white (grey scale) tibia middle slice  
181 view. Shades of grey represent the mineralization areas of bone from dark grey (less mineralization)  
182 to white (more mineralization). B) Three-dimensional black and white (grey scale) tibia inner and  
183 outer view. C) Three-dimensional coloured tibia outer layer view. Colour scale represents the  
184 mineralization areas of outer bone from dark blue (less mineralization, 0) to red (more  
185 mineralization). D) Three-dimensional coloured tibia middle slice view. Colour scale represents the  
186 mineralization areas of bone from blue (less mineralization, 0) to green (more mineralization, 2).



187

188 The same tibia bones used for 3D X-ray scanning were subjected to a three-point bending test,  
189 of which the method is described by [58], using an Instron<sup>®</sup> electromechanical universal testing  
190 machine (Instron<sup>®</sup>, Norwood, Massachusetts, United States). Maximal load of breaking point was  
191 used as the tibia ultimate strength; reached yield load just before the angle has changed on slope data  
192 was used as the tibia yield strength; the slope of the selected linear part of the curve data was used as  
193 the tibia stiffness; the area under the curve of selected region data was used as the tibia energy to  
194 fracture. Elastic modulus (GPa), which is the amount of strain as a result of a particular amount of  
195 stress [59], was calculated using the following formula [59,60]:

$$196 \quad E = \frac{N S^3}{4\delta T L^3}$$

197 where  $E$  is the elastic modulus (GPa),  $N$  is the maximal load (N),  $S$  is the span between  
198 bending fixtures (mm),  $T$  is the tibia thickness (mm),  $L$  is the tibia length (mm), and  $\delta$  is the maximum  
199 deflection (mm) at the midpoint of the bone.

## 200 **Statistical Analysis**

201 All statistical analyses were performed in SAS (Version 9.4, 2013, SAS Institute Inc., Cary,  
202 North Carolina, US). Model assumptions were approved at both means and residuals for continuous  
203 data. Non-normal distributed data were log-transformed before analyses. Pen was used as the  
204 experimental unit for all analyses.

205 All growth performance data from day 0 to 35 (BW, FI, FCR, mortality) were subjected to  
206 general mixed model analysis, using the MIXED procedure with model 1.

$$207 \quad Y = \mu + \text{enrichment} + \text{strain} + \text{enrichment} * \text{strain} + \epsilon; (1)$$

208 where  $Y$  = the dependent variable,  $\mu$  = the overall mean, enrichment = whether or not pen  
209 enrichment was applied (enriched or non-enriched), strain = broiler strain (fast-growing Ross 308 or

210 slower-growing Hubbard JA757), interaction = 2-way interaction between enrichment and strain,  $\varepsilon$   
211 = residual error.

212 From day 35 onwards, only chickens from the slower-growing strain were present and growth  
213 performance data (BW, FI, FCR, mortality) was subjected to general linear mixed model analysis,  
214 using the MIXED procedure with model 2.

$$215 \quad Y = \mu + \text{enrichment} + \varepsilon; (2)$$

216 where Y = the dependent variable,  $\mu$  is the overall mean, enrichment = whether or not pen  
217 enrichment was applied (enriched or non-enriched),  $\varepsilon$  = residual error.

218 Tibia morphological, biophysical and mechanical characteristics, at two body weight classes  
219 (1400 and 2200 g), were subjected to general linear mixed model analysis, using the MIXED  
220 procedure with model 1.

221 Home pen behaviour (eating, drinking, walking, standing, sitting, comfort behaviour,  
222 foraging, dustbathing, ground pecking, aggression and others) and gait score were subjected to  
223 general linear mixed model analysis, using the MIXED procedure with model 1 (home pen behaviour  
224 at day 8, 22 and 29) and model 2 (home pen behaviour at day 43). Preliminary analyses demonstrated  
225 a lack of interaction between strain and enrichment for home pen behaviour and consequently data is  
226 presented for only main effects. Gait score at day 27 (fast-growing chickens) and day 35 (slower-  
227 growing chickens), when they had similar body weights, were compared, using model 1, by including  
228 actual BW as a covariate.

229 Use of enrichment (chickens on platforms and ramps, chickens under platforms and ramps,  
230 dustbathing chickens and chickens perching on barriers) was subjected to general linear mixed model  
231 analysis, using the MIXED procedure with model 3.

$$232 \quad Y = \mu + \text{strain} + \varepsilon; (3)$$

233 where Y = the dependent variable,  $\mu$  is the overall mean, strain = broiler breeder strain (fast-  
234 growing Ross 308 or slower-growing Hubbard JA757),  $\varepsilon$  = residual error.

235 To eliminate BW effect between the fast and slower-growing strain, home pen behaviour and  
236 enrichment use at day 22 for fast-growing chickens and day 29 for slower-growing chickens, when  
237 they had similar body weights, were compared, using model 1 (home pen behaviour) or model 3  
238 (enrichment).

239  $VV^R$  and  $VV^L$  were subjected to general linear mixed model analysis, at two body weight  
240 classes (1400 and 2200 gram), using the MIXED procedure with model 1. Leg disorders (TD, EPA,  
241 BCO and EPI) were subjected to generalized linear mixed model analysis, at two body weight classes  
242 (1400 and 2200 gram), using the GLIMMIX procedure with model 1. Leg disorders were scored as  
243 0 (no abnormalities), 1 (minor abnormality), or 2 (severe abnormality), but analyzed as 0 (no  
244 abnormalities) or 1 (abnormalities present). EPA, BCO and EPI were not statistically analysed,  
245 because there were only three chickens scored with BCO and no observations at all were recorded for  
246 EPA and EPI.

247 Results are provided as LSmeans  $\pm$  SEM, unless indicated otherwise. When multiple  
248 comparisons were performed, the level of significance was corrected, using Bonferroni. Effects were  
249 considered to be significant at  $P \leq 0.05$ .

## 250 **Results**

### 251 **Performance**

252 No interaction effects between enrichment and strain were found on BW (Table 1). Chickens  
253 in non-enriched pens had a higher BW than chickens in enriched pens at day 21 ( $\Delta=35$  g,  $P=0.02$ ),  
254 28 ( $\Delta=62$  g,  $P=0.007$ ), 35 ( $\Delta=99$  g,  $P=0.003$ ), 42 (slower-growing chickens only;  $\Delta=84$  g,  $P=0.003$ )  
255 and 49 (slower-growing chickens only;  $\Delta=93$  g,  $P=0.005$ ). Slower-growing broilers had a lower BW  
256 than fast-growing broilers at day 0 ( $\Delta=1.8$  g), 7 ( $\Delta=29$  g), 14 ( $\Delta=134$  g), 21 ( $\Delta=321$  g), 28 ( $\Delta=540$  g)  
257 and 35 ( $\Delta=822$  g) (all  $P < 0.001$ ).

258 No interaction effects between pen enrichment and strain were found on FI (Table 2) and  
259 neither pen enrichment effects were found. Slower-growing chickens had a lower FI than fast-

260 growing broilers between day 0-14 ( $\Delta=112$  g), day 14-35 ( $\Delta=923$  g) and day 0-35 ( $\Delta=1034$  g) (all  
261  $P<0.001$ ).

262 No interaction effects between enrichment and strain were found on FCR (Table 2). Chickens  
263 in non-enriched pens had a lower FCR than chickens in enriched pens between days 0-14 ( $\Delta=0.07$ ),  
264 days 14-35 ( $\Delta=0.05$ ), days 0-35 ( $\Delta=0.05$ ) and days 0-49 ( $\Delta=0.05$ ) (all  $P<0.001$ ). Slower-growing  
265 chickens had a higher FCR than fast-growing chickens between days 0-14 ( $\Delta=0.13$ ), 14-35 ( $\Delta=0.14$ )  
266 and 0-35 ( $\Delta=0.13$ ) (all  $P<0.001$ ).

267

268 **Table 1. Effects of pen enrichment (enriched or non-enriched), broiler strain (fast-growing Ross 308 or slower-growing Hubbard JA 757)**  
 269 **and their interaction on body weight (gram) of male broiler chickens at different ages (n=7 pens per treatment, LSmeans±SEM).**

| Parameter           | Day 0             | Day 7            | Day 14           | Day 21           | Day 28            | Day 35            | Day 42 <sup>1</sup> | Day 49 <sup>1</sup> |
|---------------------|-------------------|------------------|------------------|------------------|-------------------|-------------------|---------------------|---------------------|
| Enrichment          |                   |                  |                  |                  |                   |                   |                     |                     |
| Enriched            | 36.9              | 124              | 334              | 657 <sup>b</sup> | 1070 <sup>b</sup> | 1596 <sup>b</sup> | -                   | -                   |
| Non-enriched        | 36.9              | 126              | 346              | 692 <sup>a</sup> | 1132 <sup>a</sup> | 1695 <sup>a</sup> | -                   | -                   |
| SEM                 | 0.1               | 3                | 6                | 10               | 15                | 20                | -                   | -                   |
| Strain              |                   |                  |                  |                  |                   |                   |                     |                     |
| Fast                | 37.8 <sup>a</sup> | 140 <sup>a</sup> | 407 <sup>a</sup> | 835 <sup>a</sup> | 1371 <sup>a</sup> | 2057 <sup>a</sup> | -                   | -                   |
| Slower              | 36.0 <sup>b</sup> | 111 <sup>b</sup> | 273 <sup>b</sup> | 514 <sup>b</sup> | 831 <sup>b</sup>  | 1235 <sup>b</sup> | -                   | -                   |
| SEM                 | 0.1               | 3                | 6                | 10               | 15                | 20                | -                   | -                   |
| Enrichment*strain   |                   |                  |                  |                  |                   |                   |                     |                     |
| Enriched fast       | 37.8              | 140              | 401              | 817              | 1324              | 1985              | -                   | -                   |
| Non-enriched fast   | 37.8              | 140              | 413              | 854              | 1419              | 2129              | -                   | -                   |
| Enriched slower     | 36.0              | 108              | 267              | 497              | 817               | 1208              | 1641 <sup>b</sup>   | 2144 <sup>b</sup>   |
| Non-enriched slower | 36.0              | 113              | 279              | 530              | 845               | 1261              | 1724 <sup>a</sup>   | 2237 <sup>a</sup>   |
| SEM                 | 0.2               | 4                | 8                | 14               | 21                | 29                | 15                  | 19                  |
| <i>P</i> -values    |                   |                  |                  |                  |                   |                   |                     |                     |
| Enrichment          | 0.78              | 0.60             | 0.17             | 0.02             | 0.007             | 0.003             | 0.003               | 0.005               |
| Strain              | <0.001            | <0.001           | <0.001           | <0.001           | <0.001            | <0.001            | -                   | -                   |
| Enrichment*strain   | 0.88              | 0.55             | 0.99             | 0.88             | 0.13              | 0.13              | -                   | -                   |

270 <sup>a-b</sup>Values within a column and factor lacking a common superscript differ ( $P \leq 0.05$ ).

271 <sup>1</sup>At day 42 and 49, only chickens of the slower-growing strain were present.

272

273

274

275 **Table 2. Effects of pen enrichment (enriched or non-enriched), broiler strain (fast-growing Ross 308 or slower-growing Hubbard**  
 276 **JA 757) and their interaction on feed intake (FI; gram per chicken) and feed conversion ratio (FCR=FI/BWG<sup>1</sup>) of male broiler**  
 277 **chickens in different phases of the rearing period (n=7 pens per treatment, LSmeans±SEM).**

| Parameter           | FI<br>d<br>0-14  | FI<br>d<br>14-35  | FI<br>d<br>0-35   | FI<br>d<br>35-49 <sup>2</sup> | FI<br>d<br>0-49 <sup>2</sup> | FCR<br>d<br>0-14  | FCR<br>d<br>14-35 | FCR<br>d<br>0-35  | FCR<br>d<br>35-49 <sup>2</sup> | FCR<br>d<br>0-49 <sup>2</sup> |
|---------------------|------------------|-------------------|-------------------|-------------------------------|------------------------------|-------------------|-------------------|-------------------|--------------------------------|-------------------------------|
| Enrichment          |                  |                   |                   |                               |                              |                   |                   |                   |                                |                               |
| Enriched            | 350              | 2050              | 2400              | -                             | -                            | 1.20 <sup>a</sup> | 1.62 <sup>a</sup> | 1.54 <sup>a</sup> | -                              | -                             |
| Non-enriched        | 344              | 2110              | 2470              | -                             | -                            | 1.13 <sup>b</sup> | 1.57 <sup>b</sup> | 1.49 <sup>b</sup> | -                              | -                             |
| SEM                 | 7                | 22                | 27                | -                             | -                            | 0.01              | 0.01              | 0.01              | -                              | -                             |
| Strain              |                  |                   |                   |                               |                              |                   |                   |                   |                                |                               |
| Fast                | 403 <sup>a</sup> | 2528 <sup>a</sup> | 2930 <sup>b</sup> | -                             | -                            | 1.10 <sup>b</sup> | 1.53 <sup>b</sup> | 1.45 <sup>b</sup> | -                              | -                             |
| Slower              | 291 <sup>b</sup> | 1605 <sup>b</sup> | 1896 <sup>a</sup> | -                             | -                            | 1.23 <sup>a</sup> | 1.67 <sup>a</sup> | 1.58 <sup>a</sup> | -                              | -                             |
| SEM                 | 7                | 22                | 27                | -                             | -                            | 0.01              | 0.01              | 0.01              | -                              | -                             |
| Enrichment*strain   |                  |                   |                   |                               |                              |                   |                   |                   |                                |                               |
| Enriched fast       | 408              | 2480              | 2882              | -                             | -                            | 1.13              | 1.56              | 1.48              | -                              | -                             |
| Non-enriched fast   | 398              | 2574              | 2971              | -                             | -                            | 1.07              | 1.50              | 1.42              | -                              | -                             |
| Enriched slower     | 291              | 1589              | 1895              | 2029                          | 3909                         | 1.26              | 1.69              | 1.61              | 2.17                           | 1.85 <sup>a</sup>             |
| Non-enriched slower | 291              | 1620              | 1916              | 2037                          | 3948                         | 1.20              | 1.65              | 1.56              | 2.09                           | 1.79 <sup>b</sup>             |
| SEM                 | 10               | 31                | 38                | 14                            | 23                           | 0.01              | 0.01              | 0.01              | 0.02                           | 0.01                          |
| P-values            |                  |                   |                   |                               |                              |                   |                   |                   |                                |                               |
| Enrichment          | 0.60             | 0.15              | 0.29              | 0.72                          | 0.26                         | <0.001            | <0.001            | <0.001            | 0.06                           | <0.001                        |
| Strain              | <0.001           | <0.001            | <0.001            | -                             | -                            | <0.001            | <0.001            | <0.001            | -                              | -                             |
| Enrichment*strain   | 0.58             | 0.63              | 0.81              | -                             | -                            | 0.74              | 0.47              | 0.53              | -                              | -                             |

278 <sup>a-b</sup>Values within a column and factor lacking a common superscript differ (P≤0.05).

279 <sup>1</sup>Body weight gain.

280 <sup>2</sup>Only slower-growing chickens.

281 \*FI was calculated without BSFL intake of chickens in enriched pens and by excluding the intake of the dietary supplement of chickens in non-enriched pens.

## 282 **Tibia morphological characteristics**

283 At the 1400 gram BW class, no interaction effects between pen enrichment and strain were  
284 found on tibia morphological characteristics (Table 3) and neither pen enrichment effects were found.  
285 Slower-growing chickens had a higher femoral ( $\Delta=0.17$  cm,  $P=0.02$ ) and metatarsal side proximal  
286 tibia head thicknesses ( $\Delta=0.12$  cm,  $P=0.04$ ) than fast-growing chickens. At the 2200 gram BW class,  
287 no interaction effects between enrichment and strain were found on tibia morphological  
288 characteristics (Table 3) and neither pen enrichment effects were found. Slower-growing broilers had  
289 a higher tibia weight ( $\Delta=0.81$  g,  $P=0.02$ ), proximal tibia length ( $\Delta=0.63$  cm,  $P=0.008$ ) and metatarsal  
290 side proximal tibia head thicknesses ( $\Delta=0.17$  cm,  $P=0.002$ ) than fast-growing broilers.

## 291 **Tibia biophysical characteristics**

292 At the 1400 gram BW class, no interaction effects between pen enrichment and strain were  
293 found on tibia biophysical characteristics (Table 4) and neither pen enrichment effects were found.  
294 Slower-growing broilers had a higher tibia osseous volume ( $\Delta=6.4$  cm<sup>3</sup>,  $P<0.001$ ), tibia total volume  
295 ( $\Delta=6.6$  cm<sup>3</sup>,  $P<0.001$ ), tibia volume fraction ( $\Delta=0.04$  %,  $P<0.001$ ) and tibia mineral content ( $\Delta=1.1$   
296 g,  $P<0.001$ ) than fast-growing broilers. At the 2200 gram BW class, an interaction between pen  
297 enrichment and strain was found on tibia pore volume (Table 4). Enriched slower-growing group  
298 resulted in a lower tibia pore volume compared to other three groups ( $\Delta=1.0$  cm<sup>3</sup> on average;  $P=0.02$ ).  
299 Chickens in non-enriched pens had a lower tibia osseous volume ( $\Delta=1.8$  cm<sup>3</sup>,  $P=0.003$ ), tibia total  
300 volume ( $\Delta=1.4$  cm<sup>3</sup>,  $P=0.03$ ) and tibia volume fraction ( $\Delta=0.02$  %,  $P=0.002$ ) than chickens in  
301 enriched pens. Slower-growing broilers had a higher tibia osseous volume ( $\Delta=5.9$  cm<sup>3</sup>,  $P<0.001$ ),  
302 tibia total volume ( $\Delta=5.4$  cm<sup>3</sup>,  $P<0.001$ ), tibia volume fraction ( $\Delta=0.05$  %,  $P<0.001$ ), tibia mineral  
303 content ( $\Delta=0.7$  g,  $P=0.02$ ) and tibia mineral density ( $\Delta=0.05$  g/cm<sup>3</sup>,  $P<0.001$ ) than fast-growing  
304 broilers.

## 305 **Tibia mechanical characteristics**

306           At the 1400 gram BW class, no interaction effects between pen enrichment and strain were  
307 found on tibia mechanical characteristics and neither pen enrichment effects were found (Table 5).  
308 Slower-growing broilers had a higher tibia ultimate strength ( $\Delta=21.7$  N,  $P<0.001$ ), tibia yield strength  
309 ( $\Delta=21.0$  N,  $P<0.001$ ), tibia stiffness ( $\Delta=20.6$  N/mm,  $P<0.001$ ) and tibia energy to fracture ( $\Delta=21.9$   
310 N-mm,  $P<0.001$ ) than fast-growing broilers. At the 2200 gram BW class, no interaction effects  
311 between pen enrichment and strain were found on tibia mechanical characteristics (Table 5) and  
312 neither pen enrichment effects were found. Slower-growing chickens had a higher tibia ultimate  
313 strength ( $\Delta=19.4$  N,  $P<0.001$ ), tibia yield strength ( $\Delta=17.8$  N,  $P<0.001$ ), tibia stiffness ( $\Delta=21.7$   
314 N/mm,  $P<0.001$ ) and tibia energy to fracture ( $\Delta=20.9$  N-mm,  $P<0.001$ ) than fast-growing broilers.



315 **Table 3. Effects of pen enrichment (enriched or non-enriched), broiler strain (fast-growing Ross 308 or slower-growing Hubbard JA 757)**  
 316 **and their interaction on tibia morphological characteristics of male broiler chickens in two body weight classes (1400 and 2200 gram) (2**  
 317 **chickens per pen, n=7 pens per treatment, LSmeans±SEM).**

| Parameter           | Tibia weight (g) |                    | Proximal tibia length (cm) |                    | Lateral tibia cortex thickness (cm) |        | Femoral side proximal tibia head thickness (cm) |        | Metatarsal side proximal tibia head thickness (cm) |                   | Tibia robusticity index (cm/g) |        |
|---------------------|------------------|--------------------|----------------------------|--------------------|-------------------------------------|--------|-------------------------------------------------|--------|----------------------------------------------------|-------------------|--------------------------------|--------|
|                     | 1400 g           | 2200 g             | 1400 g                     | 2200 g             | 1400 g                              | 2200 g | 1400 g                                          | 2200 g | 1400 g                                             | 2200 g            | 1400 g                         | 2200 g |
| Enrichment          |                  |                    |                            |                    |                                     |        |                                                 |        |                                                    |                   |                                |        |
| Enriched            | 12.74            | 14.37              | 9.54                       | 11.71              | 1.26                                | 1.37   | 3.56                                            | 3.79   | 3.20                                               | 3.42              | 0.75                           | 0.82   |
| Non-enriched        | 12.39            | 14.04              | 9.02                       | 11.69              | 1.22                                | 1.35   | 3.54                                            | 3.81   | 3.14                                               | 3.34              | 0.73                           | 0.83   |
| SEM                 | 0.32             | 0.22               | 0.20                       | 0.15               | 0.02                                | 0.01   | 0.05                                            | 0.04   | 0.04                                               | 0.03              | 0.01                           | 0.01   |
| Strain              |                  |                    |                            |                    |                                     |        |                                                 |        |                                                    |                   |                                |        |
| Fast                | 12.27            | 13.80 <sup>b</sup> | 9.15                       | 11.38 <sup>b</sup> | 1.23                                | 1.35   | 3.46 <sup>b</sup>                               | 3.76   | 3.11 <sup>b</sup>                                  | 3.30 <sup>b</sup> | 0.75                           | 0.83   |
| Slower              | 12.86            | 14.61 <sup>a</sup> | 9.41                       | 12.01 <sup>a</sup> | 1.25                                | 1.37   | 3.63 <sup>a</sup>                               | 3.84   | 3.23 <sup>a</sup>                                  | 3.47 <sup>a</sup> | 0.74                           | 0.82   |
| SEM                 | 0.32             | 0.22               | 0.20                       | 0.15               | 0.02                                | 0.01   | 0.05                                            | 0.04   | 0.04                                               | 0.03              | 0.01                           | 0.01   |
| Enrichment*strain   |                  |                    |                            |                    |                                     |        |                                                 |        |                                                    |                   |                                |        |
| Enriched fast       | 12.48            | 13.96              | 9.38                       | 11.47              | 1.24                                | 1.36   | 3.44                                            | 3.77   | 3.13                                               | 3.37              | 0.76                           | 0.82   |
| Non-enriched fast   | 12.05            | 13.64              | 8.92                       | 11.29              | 1.22                                | 1.34   | 3.49                                            | 3.74   | 3.09                                               | 3.22              | 0.74                           | 0.83   |
| Enriched slower     | 12.99            | 14.78              | 9.71                       | 11.94              | 1.27                                | 1.38   | 3.69                                            | 3.81   | 3.27                                               | 3.47              | 0.75                           | 0.81   |
| Non-enriched slower | 12.72            | 14.44              | 9.12                       | 12.09              | 1.23                                | 1.36   | 3.58                                            | 3.87   | 3.19                                               | 3.46              | 0.72                           | 0.84   |
| SEM                 | 0.45             | 0.31               | 0.29                       | 0.22               | 0.03                                | 0.01   | 0.07                                            | 0.06   | 0.05                                               | 0.05              | 0.01                           | 0.01   |
| <i>P</i> -values    |                  |                    |                            |                    |                                     |        |                                                 |        |                                                    |                   |                                |        |
| Enrichment          | 0.45             | 0.30               | 0.09                       | 0.93               | 0.24                                | 0.15   | 0.72                                            | 0.77   | 0.30                                               | 0.12              | 0.08                           | 0.18   |
| Strain              | 0.20             | 0.02               | 0.37                       | 0.008              | 0.47                                | 0.11   | 0.02                                            | 0.19   | 0.04                                               | 0.002             | 0.35                           | 0.86   |
| Enrichment*strain   | 0.86             | 0.99               | 0.83                       | 0.46               | 0.75                                | 0.88   | 0.24                                            | 0.45   | 0.69                                               | 0.16              | 0.58                           | 0.36   |

318 <sup>a-b</sup>Values within a column and factor lacking a common superscript differ ( $P \leq 0.05$ ).

319 **Table 4. Effects of pen enrichment (enriched or non-enriched), broiler strain (fast-growing Ross 308 or slower-growing Hubbard JA 757)**  
 320 **and their interaction on tibia biophysical characteristics of male broiler chickens in two body weight classes (1400 and 2200 gram) (2**  
 321 **chickens per pen, n=7 pens per treatment, LSmeans±SEM).**

| Parameter           | Tibia osseous volume (cm <sup>3</sup> ) |                   | Tibia pore volume (cm <sup>3</sup> ) |                  | Tibia total volume (cm <sup>3</sup> ) |                   | Tibia volume fraction (OV <sup>1</sup> /TV <sup>2</sup> ) |                   | Tibia mineral content (g) |                   | Tibia mineral density (g/cm <sup>3</sup> ) |                   |
|---------------------|-----------------------------------------|-------------------|--------------------------------------|------------------|---------------------------------------|-------------------|-----------------------------------------------------------|-------------------|---------------------------|-------------------|--------------------------------------------|-------------------|
|                     | 1400 g                                  | 2200 g            | 1400 g                               | 2200 g           | 1400 g                                | 2200 g            | 1400 g                                                    | 2200 g            | 1400 g                    | 2200 g            | 1400 g                                     | 2200 g            |
| Enrichment          |                                         |                   |                                      |                  |                                       |                   |                                                           |                   |                           |                   |                                            |                   |
| Enriched            | 21.3                                    | 25.3 <sup>a</sup> | 3.5                                  | 3.9              | 24.8                                  | 29.2 <sup>a</sup> | 0.86                                                      | 0.86 <sup>a</sup> | 11.2                      | 12.5              | 0.21                                       | 0.37              |
| Non-enriched        | 20.7                                    | 23.5 <sup>b</sup> | 3.8                                  | 4.3              | 24.5                                  | 27.8 <sup>b</sup> | 0.84                                                      | 0.84 <sup>b</sup> | 11.3                      | 12.0              | 0.19                                       | 0.37              |
| SEM                 | 0.6                                     | 0.4               | 0.2                                  | 0.1              | 0.6                                   | 0.4               | 0.01                                                      | 0.01              | 0.2                       | 0.2               | 0.01                                       | 0.01              |
| Strain              |                                         |                   |                                      |                  |                                       |                   |                                                           |                   |                           |                   |                                            |                   |
| Fast                | 17.8 <sup>b</sup>                       | 21.4 <sup>a</sup> | 3.5                                  | 4.4              | 21.3 <sup>b</sup>                     | 25.8 <sup>b</sup> | 0.83 <sup>b</sup>                                         | 0.83 <sup>b</sup> | 10.7 <sup>b</sup>         | 11.9 <sup>b</sup> | 0.19                                       | 0.34 <sup>b</sup> |
| Slower              | 24.2 <sup>a</sup>                       | 27.3 <sup>b</sup> | 3.7                                  | 3.9              | 27.9 <sup>a</sup>                     | 31.2 <sup>a</sup> | 0.87 <sup>a</sup>                                         | 0.88 <sup>a</sup> | 11.8 <sup>a</sup>         | 12.6 <sup>a</sup> | 0.21                                       | 0.39 <sup>a</sup> |
| SEM                 | 0.6                                     | 0.4               | 0.2                                  | 0.1              | 0.6                                   | 0.4               | 0.01                                                      | 0.01              | 0.2                       | 0.2               | 0.01                                       | 0.01              |
| Enrichment*strain   |                                         |                   |                                      |                  |                                       |                   |                                                           |                   |                           |                   |                                            |                   |
| Enriched fast       | 18.6                                    | 22.5              | 3.5                                  | 4.4 <sup>a</sup> | 22.1                                  | 26.9              | 0.84                                                      | 0.84              | 10.5                      | 12.0              | 0.20                                       | 0.35              |
| Non-enriched fast   | 17.0                                    | 20.3              | 3.6                                  | 4.4 <sup>a</sup> | 20.6                                  | 24.7              | 0.83                                                      | 0.82              | 10.9                      | 11.9              | 0.18                                       | 0.34              |
| Enriched slower     | 24.0                                    | 28.0              | 3.5                                  | 3.4 <sup>b</sup> | 27.4                                  | 31.5              | 0.87                                                      | 0.89              | 11.9                      | 12.9              | 0.22                                       | 0.39              |
| Non-enriched slower | 24.5                                    | 26.6              | 3.9                                  | 4.3 <sup>a</sup> | 28.4                                  | 30.9              | 0.86                                                      | 0.86              | 11.7                      | 12.2              | 0.21                                       | 0.40              |
| SEM                 | 0.8                                     | 0.5               | 0.2                                  | 0.2              | 0.9                                   | 0.6               | 0.01                                                      | 0.01              | 0.2                       | 0.2               | 0.01                                       | 0.01              |
| P-values            |                                         |                   |                                      |                  |                                       |                   |                                                           |                   |                           |                   |                                            |                   |
| Enrichment          | 0.51                                    | 0.003             | 0.18                                 | 0.02             | 0.79                                  | 0.03              | 0.10                                                      | 0.002             | 0.65                      | 0.07              | 0.21                                       | 0.78              |
| Strain              | <0.001                                  | <0.001            | 0.50                                 | 0.008            | <0.001                                | <0.001            | <0.001                                                    | <0.001            | <0.001                    | 0.02              | 0.08                                       | <0.001            |
| Enrichment*strain   | 0.20                                    | 0.50              | 0.51                                 | 0.02             | 0.19                                  | 0.16              | 0.74                                                      | 0.17              | 0.31                      | 0.26              | 0.59                                       | 0.19              |

322 <sup>a-b</sup>Values within a column and factor lacking a common superscript differ (P≤0.05).

323 <sup>1</sup>Osseous volume.

324 <sup>2</sup>Total volume.

325 **Table 5. Effects of pen enrichment (enriched or non-enriched), broiler breeder strain (fast-growing Ross 308 or slower-growing**  
326 **Hubbard JA 757), and their interaction on tibia mechanical characteristics of male broiler offspring in two body weight classes (1400**  
327 **and 2200 gram) (2 chickens per pen, n=7 pens per treatment, LSmeans±SEM).**

| Parameter           | Tibia ultimate strength (N) |                    | Tibia yield strength (N) |                    | Tibia stiffness (N/mm) |                    | Tibia energy to fracture (N-mm) |                    | Tibia elastic modulus (GPa) |        |
|---------------------|-----------------------------|--------------------|--------------------------|--------------------|------------------------|--------------------|---------------------------------|--------------------|-----------------------------|--------|
|                     | 1400 g                      | 2200 g             | 1400 g                   | 2200 g             | 1400 g                 | 2200 g             | 1400 g                          | 2200 g             | 1400 g                      | 2200 g |
| BW Class            |                             |                    |                          |                    |                        |                    |                                 |                    |                             |        |
| Enrichment          |                             |                    |                          |                    |                        |                    |                                 |                    |                             |        |
| Enriched            | 242.4                       | 274.6              | 226.4                    | 256.1              | 233.5                  | 269.1              | 231.4                           | 261.9              | 12.6                        | 12.2   |
| Non-enriched        | 237.2                       | 271.2              | 223.4                    | 254.3              | 228.6                  | 263.8              | 226.8                           | 260.2              | 12.4                        | 12.0   |
| SEM                 | 2.2                         | 1.8                | 2.1                      | 2.1                | 2.1                    | 1.9                | 2.0                             | 1.9                | 0.4                         | 0.3    |
| Strain              |                             |                    |                          |                    |                        |                    |                                 |                    |                             |        |
| Fast                | 229.0 <sup>b</sup>          | 263.2 <sup>b</sup> | 214.4 <sup>b</sup>       | 246.3 <sup>b</sup> | 220.7 <sup>b</sup>     | 255.6 <sup>b</sup> | 218.1 <sup>b</sup>              | 250.6 <sup>b</sup> | 12.4                        | 12.6   |
| Slower              | 250.6 <sup>a</sup>          | 282.6 <sup>a</sup> | 235.4 <sup>a</sup>       | 264.1 <sup>a</sup> | 241.3 <sup>a</sup>     | 277.3 <sup>a</sup> | 240.0 <sup>a</sup>              | 271.5 <sup>a</sup> | 12.6                        | 11.6   |
| SEM                 | 2.2                         | 1.8                | 2.1                      | 2.1                | 2.1                    | 1.9                | 2.0                             | 1.9                | 0.4                         | 0.3    |
| Enrichment*strain   |                             |                    |                          |                    |                        |                    |                                 |                    |                             |        |
| Enriched fast       | 229.0                       | 263.4              | 213.5                    | 246.2              | 220.6                  | 258.9              | 217.9                           | 250.5              | 12.4                        | 13.0   |
| Non-enriched fast   | 229.1                       | 263.0              | 215.4                    | 246.4              | 220.9                  | 252.3              | 218.3                           | 250.7              | 12.4                        | 12.1   |
| Enriched slower     | 255.9                       | 285.7              | 239.3                    | 266.0              | 246.4                  | 279.3              | 244.8                           | 273.3              | 12.7                        | 11.5   |
| Non-enriched slower | 245.4                       | 279.4              | 231.5                    | 262.1              | 236.3                  | 275.3              | 235.3                           | 269.8              | 12.5                        | 11.8   |
| SEM                 | 3.1                         | 2.6                | 2.9                      | 3.0                | 2.9                    | 2.7                | 2.9                             | 2.7                | 0.6                         | 0.4    |
| <i>P</i> -values    |                             |                    |                          |                    |                        |                    |                                 |                    |                             |        |
| Enrichment          | 0.11                        | 0.22               | 0.32                     | 0.55               | 0.11                   | 0.06               | 0.13                            | 0.55               | 0.83                        | 0.55   |
| Strain              | <0.001                      | <0.001             | <0.001                   | <0.001             | <0.001                 | <0.001             | <0.001                          | <0.001             | 0.78                        | 0.06   |
| Enrichment*strain   | 0.10                        | 0.27               | 0.11                     | 0.49               | 0.09                   | 0.64               | 0.10                            | 0.49               | 0.90                        | 0.18   |

328 <sup>a-b</sup>Values within a column and factor lacking a common superscript differ ( $P \leq 0.05$ ).

## 329 **Leg disorders and gait score**

330 No interaction effects between pen enrichment and broiler breeder strain were found on VV<sup>R</sup>,  
331 VV<sup>L</sup> and TD at both 1400 and 2200 gram BW classes and no main effects of pen enrichment or strain  
332 were found on TD. At the 1400 gram BW class, VV angulation was not affected by enrichment or  
333 strain (on average 4.90°). At the 2200 gram BW class, slower-growing chickens had a lower VV<sup>R</sup>  
334 than fast-growing chickens (3.80° vs 6.04°, respectively,  $P=0.003$ ). VV<sup>L</sup> angulation was not affected  
335 by enrichment or strain at this BW class (on average 5.88°). No interaction and main effects were  
336 found on TD, which was observed in 11 chickens (9.82 %) at 1400 gram BW class and 10 chickens  
337 (8.92 %) at 2200 BW class.

338 At similar BW class (day 27 for fast-growing chickens and day 35 for slower-growing  
339 chickens), an interaction between pen enrichment and strain was found on gait score. The NS group  
340 had a lower gait score compared to NF group (1.66 vs. 2.11, respectively;  $P=0.003$ ), while other two  
341 groups were in between (both 1.93).

## 342 **Home pen behaviour and use of enrichment**

343 Chickens in non-enriched pens showed less foraging behaviour at day 8 ( $\Delta=8.47$  %,  $P<0.001$ ),  
344 day 22 ( $\Delta=9.19$  %,  $P<0.001$ ), day 29 ( $\Delta=5.6$  %,  $P<0.001$ ) and day 43 (slower-growing chickens only,  
345  $\Delta=8.86$  %,  $P<0.001$ ), less dust bathing behaviour at day 8 ( $\Delta=0.97$  %,  $P=0.006$ ) and less ground  
346 pecking behaviour at day 43 (slower-growing chickens only,  $\Delta=3.98$  %,  $P=0.02$ ) than chickens in  
347 enriched pens. The opposite was found for standing behaviour at day 29 ( $\Delta=4.15$  %,  $P=0.007$ ), sitting  
348 behaviour at day 22 ( $\Delta=8.97$  %,  $P=0.03$ ), ground pecking behaviour at day 8 ( $\Delta=3.71$  %,  $P=0.002$ )  
349 and aggression behaviour at day 29 ( $\Delta=1.05$  %,  $P=0.02$ ), which behaviours were all higher in non-  
350 enriched pens than in enriched pens. Slower-growing chickens showed more walking behaviour at  
351 day 8 ( $\Delta=6.99$  %,  $P=0.001$ ), day 22 ( $\Delta=7.6$  %,  $P<0.001$ ) and day 29 ( $\Delta=5.32$  %,  $P<0.001$ ), more  
352 standing behaviour at day 8 ( $\Delta=2.34$  %,  $P=0.03$ ), day 22 ( $\Delta=3.12$  %,  $P=0.02$ ) and day 29 ( $\Delta=8.91$  %,  $P<0.001$ ), more foraging behaviour at day 22 ( $\Delta=6.61$  %,  $P=0.009$ ) and day 29 ( $\Delta=3.9$  %,  $P=0.002$ )

354 and more aggression behaviour at day 22 ( $\Delta=0.94$  %,  $P=0.03$ ) and day 29 ( $\Delta=1.02$  %,  $P=0.03$ ) than  
 355 fast-growing chickens. The opposite was found for eating behaviour at day 8 ( $\Delta=3.04$  %,  $P=0.04$ )  
 356 and day 22 ( $\Delta=1.16$  %,  $P=0.03$ ) and sitting behaviour at day 22 ( $\Delta=19.28$  %,  $P<0.001$ ) and day 29  
 357 ( $\Delta=8.91$  %,  $P<0.001$ ).

358 In enriched pens, a clear strain effect was found on use of different enrichment objects (Table  
 359 7). The percentage of chickens on platforms and ramps at day 29 ( $\Delta=14.6$  %,  $P<0.001$ ) and perching  
 360 on barriers at day 8 ( $\Delta=4.9$  %,  $P<0.001$ ), day 22 ( $\Delta=14.05$  %,  $P<0.001$ ) and day 29 ( $\Delta=16.05$  %,  $P<0.001$ )  
 361 was higher in slower-growing chickens than in fast-growing chickens. The opposite was  
 362 found for the percentage chickens under platforms and ramps at day 29 ( $\Delta=13.72$  %,  $P=0.003$ ) and  
 363 dustbathing chickens at day 8 ( $\Delta=1.19$  %,  $P=0.05$ ).

364 At similar BW, fast-growing chickens showed more walking ( $\Delta=5.24$  %), standing ( $\Delta=8.6$   
 365 %), foraging ( $\Delta=2.67$  %), dust bathing ( $\Delta=0.12$  %) and aggression ( $\Delta=1.02$  %) behaviour than fast-  
 366 growing chickens, while the opposite was found for eating ( $\Delta=0.62$  %), drinking ( $\Delta=1.54$  %), sitting  
 367 ( $\Delta=11.93$  %) and comfort ( $\Delta=2.32$  %) behaviour. At similar BW, more slower-growing chickens were  
 368 on platforms and ramps ( $\Delta=11.27$  %) and perching on barriers ( $\Delta=16.1$  %) than fast-growing  
 369 chickens, whereas the opposite was found for percentage of chickens under platforms and ramps  
 370 ( $\Delta=4.98$  %) and dustbathing chickens ( $\Delta=0.03$  %).

371  
 372 **Table 6. Effects of pen enrichment (enriched or non-enriched) and broiler strain (fast-growing**  
 373 **Ross 308 or slower-growing Hubbard JA 757) on percentage of male chickens showing eating,**  
 374 **drinking, walking, standing, sitting, comfort behaviour, foraging, dustbathing, ground pecking,**  
 375 **aggression and other behaviours at day 8, 22, 29 and 43 of age (n=7 pens per treatment;**  
 376 **LSmeans $\pm$ SEM).**

| Parameter and day (%) | Pen enrichment |              | Strain |        | SEM | <i>P</i> -values <sup>2</sup> |        |
|-----------------------|----------------|--------------|--------|--------|-----|-------------------------------|--------|
|                       | Enriched       | Non-enriched | Fast   | Slower |     | Enrichment                    | Strain |
| Eating                |                |              |        |        |     |                               |        |

|                     |                    |                    |                    |                    |      |        |        |
|---------------------|--------------------|--------------------|--------------------|--------------------|------|--------|--------|
| Day 8               | 6.90               | 6.06               | 8.00 <sup>b</sup>  | 4.96 <sup>a</sup>  | 0.94 | 0.54   | 0.04   |
| Day 22              | 1.65               | 1.80               | 2.31 <sup>b</sup>  | 1.15 <sup>a</sup>  | 0.33 | 0.75   | 0.03   |
| Day 29              | 1.78               | 2.78               | 2.86               | 1.69               | 0.46 | 0.14   | 0.09   |
| Day 43 <sup>1</sup> | 1.65               | 1.79               | -                  | -                  | 0.51 | 0.86   | -      |
| Drinking            |                    |                    |                    |                    |      |        |        |
| Day 8               | 13.17              | 12.01              | 13.76              | 11.42              | 1.58 | 0.61   | 0.31   |
| Day 22              | 5.33               | 5.58               | 5.67               | 5.24               | 0.72 | 0.81   | 0.69   |
| Day 29              | 4.36               | 4.78               | 5.00               | 4.13               | 0.72 | 0.69   | 0.40   |
| Day 43 <sup>1</sup> | 3.78               | 3.23               | -                  | -                  | 0.58 | 0.51   | -      |
| Walking             |                    |                    |                    |                    |      |        |        |
| Day 8               | 13.42              | 12.27              | 9.35 <sup>b</sup>  | 16.34 <sup>a</sup> | 1.10 | 0.47   | 0.001  |
| Day 22              | 7.92               | 7.09               | 3.70 <sup>b</sup>  | 11.30 <sup>a</sup> | 1.22 | 0.64   | <0.001 |
| Day 29              | 5.67               | 6.90               | 3.62 <sup>b</sup>  | 8.94 <sup>a</sup>  | 0.82 | 0.31   | <0.001 |
| Day 43 <sup>1</sup> | 7.99               | 8.56               | -                  | -                  | 1.46 | 0.80   | -      |
| Standing            |                    |                    |                    |                    |      |        |        |
| Day 8               | 5.68               | 7.65               | 5.50 <sup>b</sup>  | 7.84 <sup>a</sup>  | 0.72 | 0.07   | 0.03   |
| Day 22              | 4.54               | 5.44               | 3.43 <sup>b</sup>  | 6.55 <sup>a</sup>  | 0.81 | 0.44   | 0.02   |
| Day 29              | 5.50 <sup>b</sup>  | 9.65 <sup>a</sup>  | 3.12 <sup>b</sup>  | 12.03 <sup>a</sup> | 1.00 | 0.007  | <0.001 |
| Day 43 <sup>1</sup> | 13.64              | 15.84              | -                  | -                  | 1.46 | 0.29   | -      |
| Sitting             |                    |                    |                    |                    |      |        |        |
| Day 8               | 32.57              | 37.36              | 37.61              | 33.31              | 2.44 | 0.18   | 0.14   |
| Day 22              | 45.61 <sup>b</sup> | 54.58 <sup>a</sup> | 59.73 <sup>a</sup> | 40.45 <sup>b</sup> | 2.72 | 0.03   | <0.001 |
| Day 29              | 57.36              | 55.23              | 64.78 <sup>a</sup> | 47.80 <sup>b</sup> | 2.90 | 0.61   | <0.001 |
| Day 43 <sup>1</sup> | 50.06              | 58.22              | -                  | -                  | 3.97 | 0.18   | -      |
| Comfort behaviour   |                    |                    |                    |                    |      |        |        |
| Day 8               | 7.55               | 9.34               | 7.15               | 9.74               | 1.00 | 0.22   | 0.08   |
| Day 22              | 8.86               | 10.12              | 8.84               | 10.13              | 1.08 | 0.42   | 0.41   |
| Day 29              | 6.19               | 7.60               | 7.27               | 6.52               | 1.12 | 0.39   | 0.64   |
| Day 43 <sup>1</sup> | 4.46               | 3.65               | -                  | -                  | 0.95 | 0.56   | -      |
| Foraging            |                    |                    |                    |                    |      |        |        |
| Day 8               | 14.45 <sup>a</sup> | 5.98 <sup>b</sup>  | 9.67               | 10.76              | 1.00 | <0.001 | 0.45   |
| Day 22              | 12.88 <sup>a</sup> | 3.69 <sup>b</sup>  | 4.98 <sup>b</sup>  | 11.59 <sup>a</sup> | 1.64 | <0.001 | 0.009  |
| Day 29              | 8.50 <sup>a</sup>  | 2.90 <sup>b</sup>  | 3.75 <sup>b</sup>  | 7.65 <sup>a</sup>  | 0.79 | <0.001 | 0.002  |
| Day 43 <sup>1</sup> | 9.78 <sup>a</sup>  | 0.92 <sup>b</sup>  | -                  | -                  | 1.25 | <0.001 | -      |
| Dust bathing        |                    |                    |                    |                    |      |        |        |
| Day 8               | 1.09 <sup>a</sup>  | 0.12 <sup>b</sup>  | 0.90               | 0.30               | 0.23 | 0.006  | 0.07   |
| Day 22              | 0.65               | 0.44               | 0.65               | 0.44               | 0.24 | 0.56   | 0.54   |
| Day 29              | 0.46               | 0.67               | 0.36               | 0.77               | 0.28 | 0.60   | 0.31   |
| Day 43 <sup>1</sup> | 0.28               | 0.15               | -                  | -                  | 0.17 | 0.59   | -      |
| Ground pecking      |                    |                    |                    |                    |      |        |        |
| Day 8               | 4.83 <sup>b</sup>  | 8.54 <sup>a</sup>  | 7.40               | 5.97               | 0.73 | 0.002  | 0.18   |
| Day 22              | 12.02              | 10.76              | 10.60              | 12.17              | 1.17 | 0.46   | 0.36   |
| Day 29              | 10.08              | 8.33               | 9.09               | 9.31               | 1.17 | 0.31   | 0.90   |
| Day 43 <sup>1</sup> | 8.10 <sup>a</sup>  | 4.12 <sup>b</sup>  | -                  | -                  | 0.95 | 0.02   | -      |
| Aggression          |                    |                    |                    |                    |      |        |        |
| Day 8               | 0.35               | 0.22               | 0.22               | 0.35               | 0.17 | 0.60   | 0.60   |

|                     |                   |                   |                   |                   |      |      |      |
|---------------------|-------------------|-------------------|-------------------|-------------------|------|------|------|
| Day 22              | 0.61              | 0.59              | 0.14 <sup>b</sup> | 1.06 <sup>a</sup> | 0.29 | 0.97 | 0.04 |
| Day 29              | 0.12 <sup>b</sup> | 1.17 <sup>a</sup> | 0.14 <sup>b</sup> | 1.16 <sup>a</sup> | 0.29 | 0.02 | 0.03 |
| Day 43 <sup>1</sup> | 0.26 <sup>b</sup> | 3.53 <sup>a</sup> | -                 | -                 | 0.98 | 0.04 | -    |
| Others <sup>3</sup> |                   |                   |                   |                   |      |      |      |
| Day 8               | -                 | 0.13              | 0.13              | -                 | 0.08 | 0.26 | 0.26 |
| Day 22              | -                 | -                 | -                 | -                 | -    | -    | -    |
| Day 29              | -                 | -                 | -                 | -                 | -    | -    | -    |
| Day 43 <sup>1</sup> | -                 | -                 | -                 | -                 | -    | -    | -    |

377 <sup>a-b</sup>Values within a factor and row lacking a common superscript differ ( $P \leq 0.05$ ).

378 <sup>1</sup>Only slower-growing chickens.

379 <sup>2</sup>No interactions between broiler breeder strain and pen enrichment were observed for any of the behaviours at any of the  
380 sampling days.

381 <sup>3</sup>Chickens demonstrating a behaviour other than eating, drinking, walking, standing, sitting, comfort behaviour, foraging,  
382 dustbathing, ground pecking and aggression.

383 **Table 7. Effects of broiler strain (fast-growing Ross 308 or slower-growing Hubbard JA 757)**  
 384 **on percentage of male chickens in enriched pens, using the following enrichment objects (on**  
 385 **platforms and ramps, under platforms and ramps, dustbathing, perching on barriers) at day 8,**  
 386 **22, 29 and 43 of age (n=7 pens per treatment, LSmeans±SEM)**

| Parameter and day <sup>1</sup>     | Strain             |                    | SEM  | P-values |
|------------------------------------|--------------------|--------------------|------|----------|
|                                    | Fast               | Slower             |      |          |
| Chickens on platforms and ramps    |                    |                    |      |          |
| Day 8                              | 13.69              | 16.18              | 2.49 | 0.50     |
| Day 22                             | 17.98              | 24.04              | 2.06 | 0.06     |
| Day 29                             | 14.69 <sup>b</sup> | 29.25 <sup>a</sup> | 1.75 | <0.001   |
| Day 43 <sup>2</sup>                | -                  | 29.75              | -    | -        |
| Chickens under platforms and ramps |                    |                    |      |          |
| Day 8                              | 16.95              | 30.35              | 4.51 | 0.06     |
| Day 22                             | 22.74              | 16.97              | 2.60 | 0.15     |
| Day 29                             | 31.48 <sup>a</sup> | 17.76 <sup>b</sup> | 1.91 | <0.001   |
| Day 43 <sup>2</sup>                | -                  | 19.55              | -    | -        |
| Dustbathing chickens               |                    |                    |      |          |
| Day 8                              | 1.56 <sup>a</sup>  | 0.37 <sup>b</sup>  | 0.37 | 0.05     |
| Day 22                             | 0.4                | 0.63               | 0.26 | 0.54     |
| Day 29                             | 0.14               | 0.37               | 0.21 | 0.47     |
| Day 43 <sup>2</sup>                | -                  | 0.14               | -    | -        |
| Chickens perching on barriers      |                    |                    |      |          |
| Day 8                              | 2.08 <sup>b</sup>  | 6.98 <sup>a</sup>  | 0.75 | <0.001   |
| Day 22                             | 3.92 <sup>b</sup>  | 17.97 <sup>a</sup> | 1.53 | <0.001   |
| Day 29                             | 3.97 <sup>b</sup>  | 20.02 <sup>a</sup> | 0.90 | <0.001   |
| Day 43 <sup>2</sup>                | -                  | 17.57              | -    | -        |

387 <sup>a-b</sup>Values within a row lacking a common superscript differ ( $P \leq 0.05$ ).

388 <sup>1</sup>The percentages of chickens demonstrating no use of enrichment are not demonstrated in the table.

389 <sup>2</sup>Only slower-growing chickens.

390

391

392

393

394

395



## 396 **Discussion**

397           The aim of this study was to investigate effects of a combination of different forms of pen  
398 enrichment on tibia characteristics, locomotion, leg health and home pen behaviour of both fast and  
399 slower-growing broiler chickens. Hardly any interactions were found between strain and enrichment,  
400 indicating that both fast and slower-growing chickens are both able to use several forms of enrichment  
401 in a comparable way.

## 402 **Growth performance**

403           Results of the current study showed that pen enrichment resulted in lower body weight and  
404 higher FCR in both fast and slower-growing chickens. These findings are supported by recent studies  
405 [61,62], who observed a negative effect of pen enrichment on growth performance. In an earlier  
406 comparable study [38], pen enrichment resulted in lower body weight, but also in a higher FI and a  
407 lack of effect on FCR. In the latter study, the FI of the non-enriched pens included the protein-fat  
408 mixture, where this was excluded in the current study. Results of current study are not in accordance  
409 with other studies [34,63,64,65,66], who found no significant effects of pen enrichment on any growth  
410 performance parameters. This discrepancy among studies might be related to the fact that less  
411 complex pen enrichment forms were used in these studies compared to the current study. For example,  
412 only barrier perches [34,63,64] and mirror, ball, perch and dust (each material in another pen) [65]  
413 were used in these studies. The lower body weight gain of enriched-housed broilers in the current  
414 experiment might be related to 1) the comprehensive enrichment design of the current study, which  
415 contains a combination of platforms, angular ramps, barrier perches, large distance between feed and  
416 water and live Black Soldier fly larvae in the moss-peat dust bathing area. A plethora of different  
417 enrichments might exponentially stimulate physical activity and consequently a higher metabolic  
418 energy use, which will result in a lower body weight gain. This higher activity in enriched pens is  
419 supported by the higher percentage of chickens showing active behaviours and use of enrichment in  
420 both fast and slower-growing chickens. 2) Chickens might have had difficulties to cross the barrier

421 perches to access the feed on one side and water on the other side [38]. This might be due to other  
422 chickens perching and consequently blocking the way from one side of the pen to the other side. It  
423 might also be related to their heavy body weight, particularly in the last week of the rearing period.  
424 Whether or not a more balanced pen enrichment might have comparable stimulatory effects on  
425 activity, while maintaining performance, needs to be investigated.

426         Regarding the strain, in the current study, body weight and feed intake of fast-growing  
427 chickens were higher than slower-growing broiler chickens on same ages, which is in accordance  
428 with previous studies [45,66,67,68]. Due to a use of very young broiler breeders, body weight gain  
429 and BW at slaughter was relatively low [69,70], which might have resulted in a low prevalence of leg  
430 disorders as well (see below).

### 431 **Tibia characteristics**

432         One of the most important underlying reasons for suboptimal bone development in broiler  
433 chickens is high growth rate, while low activity levels is the other one [12,24,41]. The hypothesis of  
434 this study was that leg health and bone characteristics in broiler chickens can be improved through  
435 pen enrichment, which has previously been confirmed by several studies [21,30,31,33,35]. Focusing  
436 on bone properties, a higher activity has been found to positively affect tibia morphological,  
437 biophysical and mechanical characteristics of chickens [26,33,35,44,72,73]. A large distance between  
438 feed and water resulted in increased walking activity [18] and better tibia development in broiler  
439 chickens [26,33]. Barrier perches resulted in improved tibia characteristics of laying hens [71]. Using  
440 sand as a dustbathing material and addition of strings for activity stimulation resulted in better bone  
441 development in fast-growing broiler chickens [72].

442         The results of the current study showed that tibia osseous volume, total volume and volume  
443 fraction of both fast and slower-growing broiler chickens and tibia pore volume of slower-growing  
444 chickens only were positively affected by pen enrichment, while most of the other tibia characteristics  
445 were slightly higher, but not significant. These findings are in agreement with previous studies,

446 indicating the stimulating effects of pen enrichment on bone characteristics [33,73,74]. Tibia  
447 characteristics were found correlated with leg disorders and locomotion. Chickens with advanced  
448 tibia characteristics showed better locomotion and less leg disorders [73,74]. In the current study, it  
449 can be suggested that bone mineral deposition is the most stimulated physiological mechanism by  
450 pen enrichment, whereas tibia morphological and mechanical characteristics, such as tibia weight,  
451 length, strength and stiffness, were not affected. It can be hypothesized that stimulated activity due  
452 to pen enrichment particularly affects physiological pathways involved in ossification and  
453 mineralization, rather than affecting anatomical and physical tibia characteristics.

454         Regarding the strain, almost all tibia morphological, biophysical and mechanical  
455 characteristics in both body weight classes were higher in slower-growing chickens than in fast-  
456 growing chickens. These findings are in line with previous studies, indicating that slower-growing  
457 chickens demonstrate better bone characteristics in all ages compared to fast-growing chickens  
458 [14,42,43,75,76]. Fast-growing chickens have more porous and less mineralized leg bones than  
459 slower-growing broiler chickens, which together with a higher body weight results in a higher risk of  
460 lameness [14,42,43,44,45,77], impaired activity and locomotion [24,26,46,48,49,78] and more leg  
461 problems [46,51].

## 462 **Leg disorders and gait score**

463         In the current study, the incidence of TD did not differ between pen enrichment, nor between  
464 strains, while other leg disorders (BCO, EPA and EPI) were hardly or not observed. These results  
465 might be explained by a relatively low stocking density (10 chickens/m<sup>2</sup>), which is related to a low  
466 prevalence of leg disorders [10,40,77,79]. Additionally, BW of the chickens was relatively low,  
467 probably related to the use of offspring from young broiler breeders. VV angulation in right legs was  
468 found to be higher in fast-growing chickens than in slower-growing chickens. These results are in  
469 line with previous studies, indicating that growth rate plays an important role on the prevalence of  
470 VV [12,80,81,82]. This might be explained by irregular and poor vascular morphology of the

471 epiphyseal growth plate and insufficiently mineralized bones in fast-growing broiler chickens [81,83].  
472 Slower-growing chickens, on the contrary, have more time for bone mineralization, which  
473 compensates the lack of mineralization in the early growth phase, that loads less stress on the skeleton  
474 [73,83,84,85], and eventually result in a low incidence of VV. Despite the fact that VV angulation in  
475 right legs differed between strains in the current study, the maximal average angulation was 6.04° and  
476 it can be disputed whether or not this degree of angulation can be considered as VV or as a leg  
477 disorder.

478 Better gait was found in slower-growing chickens than in fast-growing chickens, both housed  
479 in non-enriched pens, while chickens of both strains in enriched pens had a gait score in between. It  
480 can be speculated that in fast-growing chickens provided with sufficient enrichment, locomotion can  
481 be stimulated, but in case no enrichment is present, fast-growing chickens show poorer gait scores  
482 than slower-growing chickens. Stimulating locomotion by pen enrichment might be more beneficial  
483 for fast-growing chickens, since they have less advanced bone development and poorer leg health  
484 than slower-growing chickens [38,42,74,75,85,86]. However, in the current study differences  
485 between treatments were relatively small.

## 486 **Home pen behaviour and use of enrichment**

487 Results of home pen behaviour showed that broiler chickens in enriched pens demonstrated  
488 higher or a tendency to higher percentages of active behaviours (e.g., standing, walking, foraging)  
489 and lower percentages of passive behaviours (e.g., comfort behaviour, sitting) than chickens in non-  
490 enriched pens. This is in accordance with previous studies, indicating that pen enrichment may  
491 stimulate physical activity. Placing horizontal platforms [21,23,33], angular ramps [87] and barrier  
492 perches [30,31,32,88] resulted in stimulated activity in broiler chickens. Using wooden boxes with  
493 peat for dust bathing, two platforms with ramps and two bales of peat as a pen enrichment resulted in  
494 more wing flapping, wing stretching, body shaking, ground scratching, ground pecking and foraging  
495 behaviours in fast-growing broiler chickens compared to non-enriched pens [89]. Scattering

496 mealworms [36] and Black Soldier fly larvae [37,38] on the litter in fast-growing broiler chickens  
497 resulted in increased physical activity and locomotion. A large distance between feeder and drinker  
498 as a pen enrichment also resulted in a high percentage of active behaviours [38,62,90]. Different  
499 dustbathing materials, such as moss-peat have also been found to contribute to activity of broiler  
500 chickens [35,38].

501 In the current study, slower-growing broiler chickens demonstrated higher or tendency to higher  
502 percentages of active behaviours (e.g., standing, walking, foraging) and lower percentages of passive  
503 behaviours (e.g., comfort behaviour, sitting) at all observation days and also on similar body weights  
504 (day 22 for fast-growing chickens and day 29 for slower-growing chickens) than fast-growing  
505 chickens. In addition, use of enrichment objects differed between fast and slower-growing broiler  
506 chickens. The most attention-grabbing difference was observed in chickens perching on barriers. A  
507 considerably higher percentage of slower-growing chickens were found perching on barriers  
508 compared to fast-growing chickens at all ages and also at the same body weight. Slower-growing  
509 chickens also showed a higher or a tendency to higher preference to go on ramps and platforms, while  
510 fast-growing chickens preferred to stay under the platforms and ramps. These findings are in in line  
511 with previous studies showing slower-growing chickens demonstrated more active behaviours than  
512 fast-growing chickens. Fast-growing broiler chickens showed higher percentages of time sitting idle  
513 and lower percentages of time standing and walking than slower-growing chickens [26,45,47,49].  
514 Slower-growing chickens have been found to use perches more than fast-growing chickens [30,38,  
515 91,92,93]. It has been shown that fast-growing broiler chickens showed a preference for lying and  
516 sitting on the litter instead of using raised platforms and perches. All these findings might be due to  
517 the imbalance between high growth rate and immature bones of fast-growing chickens than slower-  
518 growing chickens, which negatively affects standing, particularly at higher body weights, walking  
519 and foraging behaviours. This makes fast-growing chickens have more difficulties with barrier  
520 perches to access feed and water, to climb and go down on angular ramps than the slower-growing

521 chickens. Another potential reason for these differences between strains might be related to body  
522 weight and heavy breast muscles. However, the current study clearly demonstrates that at the same  
523 BW class, still differences in activity related behaviours were present between the fast and slower-  
524 growing chickens, which suggests that other aspects than BW appears to play a role as well.

## 525 **Conclusion**

526 In both slower and fast-growing chickens, tibia biophysical characteristics were positively  
527 influenced by comprehensive pen enrichment, while tibia morphological and mechanical  
528 characteristics were not affected, suggesting that pen enrichment particularly affects physiological  
529 mechanisms related to ossification and mineralization. Slower-growing chickens showed better tibia  
530 characteristics, and active behaviours than fast-growing chickens. Pen enrichment resulted in lower  
531 body weight gain in both fast and slower-growing chickens, which might be due to higher activity or  
532 lower feed intake as a result of difficulties of crossing the barrier perches. The relationship between  
533 tibia development and leg health remains unclear, because of the very low incidence of leg disorders  
534 in the current study.

## 535 **Acknowledgments**

536 This experiment was the part of the “Healthy Bones” project, financed by a public-private  
537 partnership (TKI-AF-15203; BO-63-001-004). The financial support of the Ministry of Agriculture,  
538 Nature, and Food Quality (The Netherlands), Aviagen (UK), Darling Ingredients Inc., ForFarmers  
539 N.V., Hubbard, Marel Stork Poultry Processing BV, Nepluvi (all The Netherlands) and Trouw  
540 Nutrition (Nutreco) is gratefully acknowledged. The authors would like to thank Remco Hamoen for  
541 his expertise during the 3D micro-CT X-ray scanning. Bert van Nijhuis, Henny Reimert, Ilona van  
542 der Anker-Hensen, Bjorge Laurensen and the animal caretakers and staff at Wageningen  
543 Bioveterinary Research (Lelystad, The Netherlands) are acknowledged for their assistance during the  
544 experiment.

## 545 **References**

- 546 1. Havenstein GB, Ferket PR, Qureshi MA. Growth, livability, and feed conversion of 1957  
547 versus 2001 broilers when fed representative 1957 and 2001 broiler diets. *Poult Sci* 2003; 82:  
548 1500-1508.
- 549 2. Knowles TG, Kestin SC, Haslam SM, Brown SN, Green LE, Butterworth A, et al. Leg  
550 disorders in broiler chickens: prevalence, risk factors and prevention. *PLoS OnE*. 2008; 3:  
551 1545.
- 552 3. Petracci M, Cavani C. Muscle growth and poultry meat quality issues. *Nutrients*. 2012; 4: 1-  
553 12.
- 554 4. Zuidhof MJ, Schneider BL, Carney VL, Korver DR, Robinson FE. Growth, efficiency, and  
555 yield of commercial broilers from 1957, 1978, and 2005. *Poult Sci*. 2014; 93: 2970-2982.
- 556 5. Sherlock L, Demmers TGM, Goodship AE, McCarthy ID, Wathes CM. The relationship  
557 between physical activity and leg health in the broiler chicken. *Br Poult Sci*. 2010; 51: 22-30.
- 558 6. González-Cerón F, Rekaya R, Aggrey SE. Genetic analysis of bone quality traits and growth  
559 in a random mating broiler population. *Poult Sci*. 2015; 94: 883-889.
- 560 7. Tallentire CW, Leinonen I, Kyriazakis I. Breeding for efficiency in the broiler chicken: A  
561 review. *Agron Sustain Dev*. 2016; 36: 1-16.
- 562 8. Gocsik É, Silvera AM, Hansson H, Saatkamp HW, Blokhuis HJ. Exploring the economic  
563 potential of reducing broiler lameness. *Br Poult Sci*. 2017; 58: 337-347.
- 564 9. Morris MP. National survey of leg problems. *Pigs and Poultry*, 1993; 6: 16.
- 565 10. Bessei W. Welfare of broilers: a review. *Worlds Poult Sci J*. 2006; 62: 455-466.
- 566 11. McKay JC, Barton NF, Koerhuis ANM, McAdam J. The challenge of genetic change in the  
567 broiler chicken. *BSAP Occas Publ*. 2000; 27: 1-7.
- 568 12. Bradshaw RH, Kirkden RD, Broom DM. A review of the aetiology and pathology of leg  
569 weakness in broilers in relation to welfare. *Avian Poult Biol Rev*. 2002; 13: 45-104.

- 570 13. EFSA panel on animal health and welfare. Scientific opinion on the influence of genetic  
571 parameters on the welfare and the resistance to stress of commercial broilers. EFSA journal.  
572 2010; 8: 1666.
- 573 14. Sullivan TW. Skeletal problems in poultry: estimated annual cost and descriptions. Poult Sci.  
574 1994; 73: 879-882.
- 575 15. Kestin SC, Su G, Sørensen P. Different commercial broiler crosses have different  
576 susceptibilities to leg weakness. Poult Sci. 1999; 78: 1085-1090.
- 577 16. Mench J. Lameness. In: Measuring and auditing broiler welfare. 2004. p. 3-17.
- 578 17. Grandin T. Auditing animal welfare at slaughter plants. Meat Sci. 2010; 86:56-65.
- 579 18. Reiter K, Bessei W. Effect of locomotor activity on leg disorder in fattening chicken. Berl  
580 Munch Tierarztl Wochenschr. 2009; 122: 264-270.
- 581 19. Blatchford RA, Archer GS, Mench JA. Contrast in light intensity, rather than day length,  
582 influences the behavior and health of broiler chickens. Poult Sci. 2012; 91: 1768-1774.
- 583 20. Ohara A, Oyakawa C, Yoshihara Y, Ninomiya S, Sato S. Effect of environmental enrichment  
584 on the behavior and welfare of Japanese broilers at a commercial farm. J Poult Sci. 2015; p.  
585 0150034.
- 586 21. Pedersen IJ, Forkman B. Improving leg health in broiler chickens: a systematic review of the  
587 effect of environmental enrichment. Anim Welf. 2019; 28: 215-230.
- 588 22. Sandilands V, Moinard C, Sparks NHC. Providing laying hens with perches: fulfilling  
589 behavioural needs but causing injury?. Brit Poult Sci. 2009; 50: 395-406.
- 590 23. Kaukonen E, Norring M, Valros A. Effect of litter quality on foot pad dermatitis, hock burns  
591 and breast blisters in broiler breeders during the production period. Avian Pathol. 2016; 45:  
592 667-673.
- 593 24. Weeks CA, Danbury TD, Davies HC, Hunt P, Kestin SC. The behaviour of broiler chickens  
594 and its modification by lameness. Appl Anim Behav Sci. 2000; 67: 111-125.



- 595 25. Reiter K, Bessei W. Possibilities to reduce leg disorders in broilers and turkeys. Arch Für  
596 Geflügelkunde. 1998; 62: 145-149.
- 597 26. Reiter K, Bessei W. Effect of locomotor activity on bone development and leg disorders in  
598 broilers. Arch Für Geflügelkunde (Germany). 1998.
- 599 27. Balog JM, Bayyari GR, Rath NC, Huff WE, Anthony NB. Effect of intermittent activity on  
600 broiler production parameters. Poult Sci. 1997; 76: 6-12.
- 601 28. Martrenchar A, Huonnic D, Cotte JP, Boilletot E, Morisse JP. Influence of stocking density,  
602 artificial dusk and group size on the perching behaviour of broilers. Br Poult Sci. 2000; 41:  
603 125-130.
- 604 29. Hall AL. The effect of stocking density on the welfare and behaviour of broiler chickens  
605 reared commercially. Anim Welf. 2001; 10: 23-40.
- 606 30. Ventura, B. A., F. Siewerdt, and I. Estevez. 2012. Access to barrier perches improves behavior  
607 repertoire in broilers. PloS one. 7:29826.
- 608 31. Zhao JP, Jiao HC, Jiang YB, Song ZG, Wang XJ, Lin H. Cool perches improve the growth  
609 performance and welfare status of broiler chickens reared at different stocking densities and  
610 high temperatures. Poult Sci. 2013; 92: 1962-1971.
- 611 32. Kaukonen E, Norring M, Valros A. Perches and elevated platforms in commercial broiler  
612 farms: use and effect on walking ability, incidence of tibial dyschondroplasia and bone  
613 mineral content. Animal. 2017; 11: 864-871.
- 614 33. Pedersen IJ, Tahamtani FM, Forkman B, Young JF, Poulsen, HD, Riber AB. Effects of  
615 environmental enrichment on health and bone characteristics of fast growing broiler chickens.  
616 Poult Sci. 2020; 99: 1946-1955.
- 617 34. Bizeray D, Estevez I, Leterrier C, Faure JM. Effects of increasing environmental complexity  
618 on the physical activity of broiler chickens. Appl Anim Behav Sci. 2002; 79: 27-41.

- 619 35. Riber AB, van de Weerd HA, De Jong IC, Steinfeldt S. Review of environmental enrichment  
620 for broiler chickens. *Poult Sci.* 2018; 97: 378-396.
- 621 36. Pichova K, Nordgreen J, Leterrrier C, Kostal L, Moe RO. The effects of food-related  
622 environmental complexity on litter directed behaviour, fear and exploration of novel stimuli  
623 in young broiler chickens. *Appl Anim Behav Sci.* 2016; 174: 83-89.
- 624 37. Ipema AF, Gerrits WJ, Bokkers EA, Kemp B, Bolhuis JE. Provisioning of live black soldier  
625 fly larvae (*Hermetia illucens*) benefits broiler activity and leg health in a frequency-and dose-  
626 dependent manner. *Appl Anim Behav Sci.* 2020; 230: p. 105082.
- 627 38. De Jong IC, Blaauw XE, Van der Eijk JAJ, Da Silva CS, Van Krimpen MM, et al. Providing  
628 environmental enrichments affects activity and performance, but not leg health in fast- and  
629 slower-growing broiler chickens. *Appl Anim Behav Sci.* 2021; 105375.
- 630 39. Yıldız H, Petek M, Sönmez G, Arıcan I, Yılmaz B. Effects of lighting schedule and ascorbic  
631 acid on performance and tibiotarsus bone characteristics in broilers. *Turkish J Vet Anim Sci.*  
632 2009; 33: 469-476.
- 633 40. Buijs S, van Poucke E, Van Dongen S, Lens L, Baert J, Tuytens FA. The influence of stocking  
634 density on broiler chicken bone quality and fluctuating asymmetry. *Poult Sci.* 2012; 91: 1759-  
635 1767.
- 636 41. Van der Pol CW, Molenaar R, Buitink CJ, Van Roover-Reijrink IAM, Maatjens CM, van den  
637 Brand H, et al. Lighting schedule and dimming period in early life: consequences for broiler  
638 chicken leg bone development. *Poult Sci.* 2015; 94: 2980-2988.
- 639 42. Williams B, Solomon S, Waddington D, Thorp B, Farquharson C. Skeletal development in  
640 the meat-type chicken. *Br Poult Sci.* 2000; 41: 141-149.
- 641 43. Torres CA, Korver DR. Influences of trace mineral nutrition and maternal flock age on broiler  
642 embryo bone development. *Poult Sci.* 2018; 97: 2996-3003.

- 643 44. Williams B, Waddington D, Murray DH, Farquharson C. Bone strength during growth:  
644 influence of growth rate on cortical porosity and mineralization. *Calcif Tissue Int.* 2004; 74:  
645 236-245.
- 646 45. Stojcic MD, Bessei W. The effect of locomotor activity and weight load on bone problems in  
647 fast and slow growing chickens. *Arch für Geflügelkunde.* 2009; 73: 242-249.
- 648 46. Bokkers EA, Koene P. Motivation and ability to walk for a food reward in fast and slower-  
649 growing broilers to 12 weeks of age. *Behav Process.* 2004; 67: 121-130.
- 650 47. Wallenbeck A, Wilhelmsson S, Jönsson L, Gunnarsson S, Yngvesson J. Behaviour in one fast  
651 growing and one slow-growing broiler (*Gallus gallus domesticus*) hybrid fed a high-or low-  
652 protein diet during a 10-week rearing period. *Acta Agr Scand A—An Sci.* 2016; 66: 168-176.
- 653 48. Lewis PD, Perry GC, Farmer LJ, Patterson RLS. Responses of two genotypes of chicken to  
654 the diets and stocking densities typical of UK and ‘Label Rouge production systems: I.  
655 Performance, behaviour and carcass composition. *Meat Sci.* 1997; 45: 501-516.
- 656 49. Cornetto T, Estevez I. Behavior of the domestic fowl in the presence of vertical panels. *Poult*  
657 *Sci.* 2001; 80: 1455-1462.
- 658 50. Reiter K, Kutritz B. Behaviour and leg weakness in different broiler breeds. *Arch für*  
659 *Geflügelkunde.* 2001; 65: 137-141.
- 660 51. Kjaer JB, Su G, Nielsen BL, Sørensen P. Foot pad dermatitis and hock burn in broiler chickens  
661 and degree of inheritance. *Poult Sci.* 2006; 85: 1342-1348.
- 662 52. Havenstein GB, Ferket PR, Scheideler SE, Larson BT. Growth, livability, and feed conversion  
663 of 1957 vs 1991 broilers when fed “typical” 1957 and 1991 broiler diets. *Poult Sci.* 1994; 73:  
664 1785-1794.
- 665 53. De Jong IC, Gunnink H. Effects of a commercial broiler enrichment programme with or  
666 without natural light on behaviour and other welfare indicators. *Anim.* 2019; 13: 384-391.

- 667 54. Kestin SC, Knowles TG, Tinch AE, Gregory NG. Prevalence of leg weakness in broiler  
668 chickens and its relationship with genotype. *Vet Rec.* 1992; 131: 190-194.
- 669 55. Güz BC, Molenaar R, De Jong IC, Kemp B, Van Krimpen M, Van Den Brand H. Effects of  
670 eggshell temperature pattern during incubation on tibia characteristics of broiler chickens at  
671 slaughter age. *Poult Sci.* 2020; 99: 3020-3029.
- 672 56. Güz BC, Molenaar R, De Jong IC, Kemp B, Van Krimpen M, Van den Brand H. Effects of  
673 green light emitting diode light during incubation and dietary organic macro and trace  
674 minerals during rearing on tibia characteristics of broiler chickens at slaughter age. *Poult Sci.*  
675 2021; 100: 707-720.
- 676 57. Riesenfeld A. Metatarsal robusticity in bipedal rats. *Am J Phys Anthropol.* 1972; 36: 229-233.
- 677 58. Jungmann R, Schitter G, Fantner GE, Lauer ME, Hansma PK, Thurner PJ. Real-time  
678 microdamage and strain detection during micromechanical testing of single trabeculae. In:  
679 *Experimental and Applied Mechanics: SEM Annual Conference and Exposition.* 2007. pp. 0-  
680 11.
- 681 59. Novitskaya E, Chen PY, Hamed E, Jun L, Lubarda VA, Jasiuk I, et al. Recent advances on  
682 the measurement and calculation of the elastic moduli of cortical and trabecular bone: a  
683 review. *Theor Appl Mech.* 2011; 38: 209-297.
- 684 60. Turner CH, Burr DB. Basic biomechanical measurements of bone: a tutorial. *Bone.* 1993; 14:  
685 595-608.
- 686 61. Bach MH, Tahamtani FM, Pedersen IJ, Riber AB. Effects of environmental complexity on  
687 behaviour in fast-growing broiler chickens. *Appl Anim Behav Sci.* 2019; 219: pp. 104840.
- 688 62. Jones PJ, Tahamtani, FM, Pedersen IJ, Niemi JK, Riber AB. The productivity and financial  
689 impacts of eight types of environmental enrichment for broiler chickens. *Animals.* 2020; 10:  
690 378.

- 691 63. Pettit-Riley R, Estevez I. Effects of density on perching behavior of broiler chickens. Appl  
692 Anim Behav Sci. 2001; 71: 127-140.
- 693 64. Simsek UG, Dalkilic B, Ciftci M, Cerci IH, Bahsi M. Effects of enriched housing design on  
694 broiler performance, welfare, chicken meat composition and serum cholesterol. Acta Vet  
695 Brno. 2009; 78: 67-74.
- 696 65. Yildirim M, Taskin A. The effects of environmental enrichment on some physiological and  
697 behavioral parameters of broiler chicks. Braz J Poult Sci. 2017; 19: 355-362.
- 698 66. Benyi K, Acheampong-Boateng O, Norris D, Ligaraba TJ. Response of Ross 308 and Hubbard  
699 broiler chickens to feed removal for different durations during the day. Trop Anim Health Pro.  
700 2010; 42: 1421-1426.
- 701 67. Benyi K, Netshipale AJ, Mahlako KT, Gwata ET. Effect of genotype and stocking density on  
702 broiler performance during two subtropical seasons. Trop Anim Health Pro. 2015; 47: 969-  
703 974.
- 704 68. Dixon LM. Slow and steady wins the race: The behaviour and welfare of commercial faster  
705 growing broiler breeds compared to a commercial slower growing breed. PLoS ONE. 2020;  
706 15: e0231006.
- 707 69. Peebles ED, Doyle SM, Pansky T, Gerard PD, Latour MA, Boyle CR, et al. Effects of breeder  
708 age and dietary fat on subsequent broiler performance. 1. Growth, mortality, and feed  
709 conversion. Poult Sci. 1999; 78: 505-511.
- 710 70. Nasri H, Van den Brand H, Najjar T, Bouzouaia M. Interactions between egg storage duration  
711 and broiler breeder age on egg fat content, chicken organ weights, and growth performance.  
712 Poult Sci. 2020; 99: 4607-4615.
- 713 71. Hughes BO, Wilson S, Appleby MC, Smith SF. Comparison of bone volume and strength as  
714 measures of skeletal integrity in caged laying hens with access to perches. Res Vet Sci. 1993;  
715 54: 202-206.

- 716 72. Arnould C, Bizeray D, Faure JM, Leterrier C. Effects of the addition of sand and string to  
717 pens on use of space, activity, tarsal angulations and bone composition in broiler chickens.  
718 *Anim Welf.* 2004; 13: 87-94.
- 719 73. Toscano MJ, Nasr MAF, Hothersall B. Correlation between broiler lameness and anatomical  
720 measurements of bone using radiographical projections with assessments of consistency  
721 across and within radiographs. *Poult Sci.* 2013; 92: 2251-2258.
- 722 74. Sørensen P, Su G, Kestin SC. Effects of age and stocking density on leg weakness in broiler  
723 chickens. *Poult Sci.* 2000; 79: 864-870.
- 724 75. Lilburn MS. Skeletal growth of commercial poultry species. *Poult Sci.* 1994; 73: 897-903.
- 725 76. Thorp BH, Waddington D. Relationships between the bone pathologies, ash and mineral  
726 content of long bones in 35-day-old broiler chickens. *Res Vet Sci.* 1997; 62: 67-73.
- 727 77. Shim MY, Karnuah AB, Mitchell AD, Anthony NB, Pesti GM, Aggrey SE. The effects of  
728 growth rate on leg morphology and tibia breaking strength, mineral density, mineral content,  
729 and bone ash in broilers. *Poult Sci.* 2012; 91: 1790-1795.
- 730 78. Siegel PB, Honaker CF, Rauw WM. Selection for high production in poultry. CABI  
731 Publishing: Wallingford, UK. 2009; pp. 230-242.
- 732 79. Buijs S, Keeling L, Rettenbacher S, Van Poucke E, Tuytens FAM. Stocking density effects  
733 on broiler welfare: Identifying sensitive ranges for different indicators. *Poult Sci.* 2009; 88:  
734 1536-1543.
- 735 80. Leterrier C, Nys Y. Clinical and anatomical differences in varus and valgus deformities of  
736 chick limbs suggest different aetio-pathogenesis. *Avian Pathol.* 1992; 21: 429-442.
- 737 81. Shim MY, Karnuah AB, Anthony NB, Pesti GM, Aggrey SE. The effects of broiler chicken  
738 growth rate on valgus, varus, and tibial dyschondroplasia. *Poult Sci.* 2012; 91: 62-65.
- 739 82. González-Cerón F, Rekaya R, Anthony NB, Aggrey SE. Genetic analysis of leg problems and  
740 growth in a random mating broiler population. *Poult Sci.* 2015; 94: 162-168.

- 741 83. Kestin SC, Gordon S, Su G, Sørensen P. Relationships in broiler chickens between lameness,  
742 liveweight, growth rate and age. *Vet Rec.* 2001; 148: 195-197.
- 743 84. Thorp BH. Skeletal disorders in the fowl: a review. *Avian Path.* 1994; 23: 203-236.
- 744 85. Sanchez-Rodriguez E, Benavides-Reyes C, Torres C, Dominguez-Gasca N, Garcia-Ruiz AI,  
745 Gonzalez-Lopez S, et al. Changes with age (from 0 to 37 D) in tibiae bone mineralization,  
746 chemical composition and structural organization in broiler chickens. *Poult Sci.* 2019; 98:  
747 5215-5225.
- 748 86. Rayner AC, Newberry RC, Vas J, Mullan S. Slow-growing broilers are healthier and express  
749 more behavioural indicators of positive welfare. *Sci Rep.* 2020; 10: 1-14.
- 750 87. Birgul OB, Mutaf S, Alkan S. Effects of different angled perches on leg disorders in broilers.  
751 *Arch für Geflügelkunde.* 2012; 76: 44-48.
- 752 88. Bench CJ, Oryschak MA, Korver DR, Beltranena E. Behaviour, growth performance, foot  
753 pad quality, bone density, and carcass traits of broiler chickens reared with barrier perches  
754 and fed different dietary crude protein levels. *Can J Anim Sci.* 2016; 97: 268-280.
- 755 89. Vasdal G, Vas J, Newberry RC, Moe RO. Effects of environmental enrichment on activity  
756 and lameness in commercial broiler production. *J Appl Anim Welf Sci.* 2019; 22: 197-205.
- 757 90. Reiter K, Bessei W. Effect of the distance between feeder and drinker on behaviour and leg  
758 disorders of broilers. In: *Proceedings of the 30th International Congress of the International*  
759 *Society for Applied Ethology.* 1996.
- 760 91. Groves PJ, Muir WI. June. Use of perches by broiler chickens in floor pen experiments. In:  
761 *Proceedings of the IX European Symposium on Poultry Welfare.* 2013. pp. 17-20.
- 762 92. Yngvesson J, Wedin M, Gunnarsson S, Jönsson L, Blokhuis H, Wallenbeck A. Let me sleep!  
763 Welfare of broilers (*Gallus gallus domesticus*) with disrupted resting behaviour. *Acta Agr*  
764 *Scand A—An Sci.* 2017; 67: 123-133.

- 765            93. Bailie CL, O'Connell NE. Perch design preferences of commercial broiler chickens reared in  
766            windowed houses. In Proc. EAAP 67th Annual Meeting. 2016ç





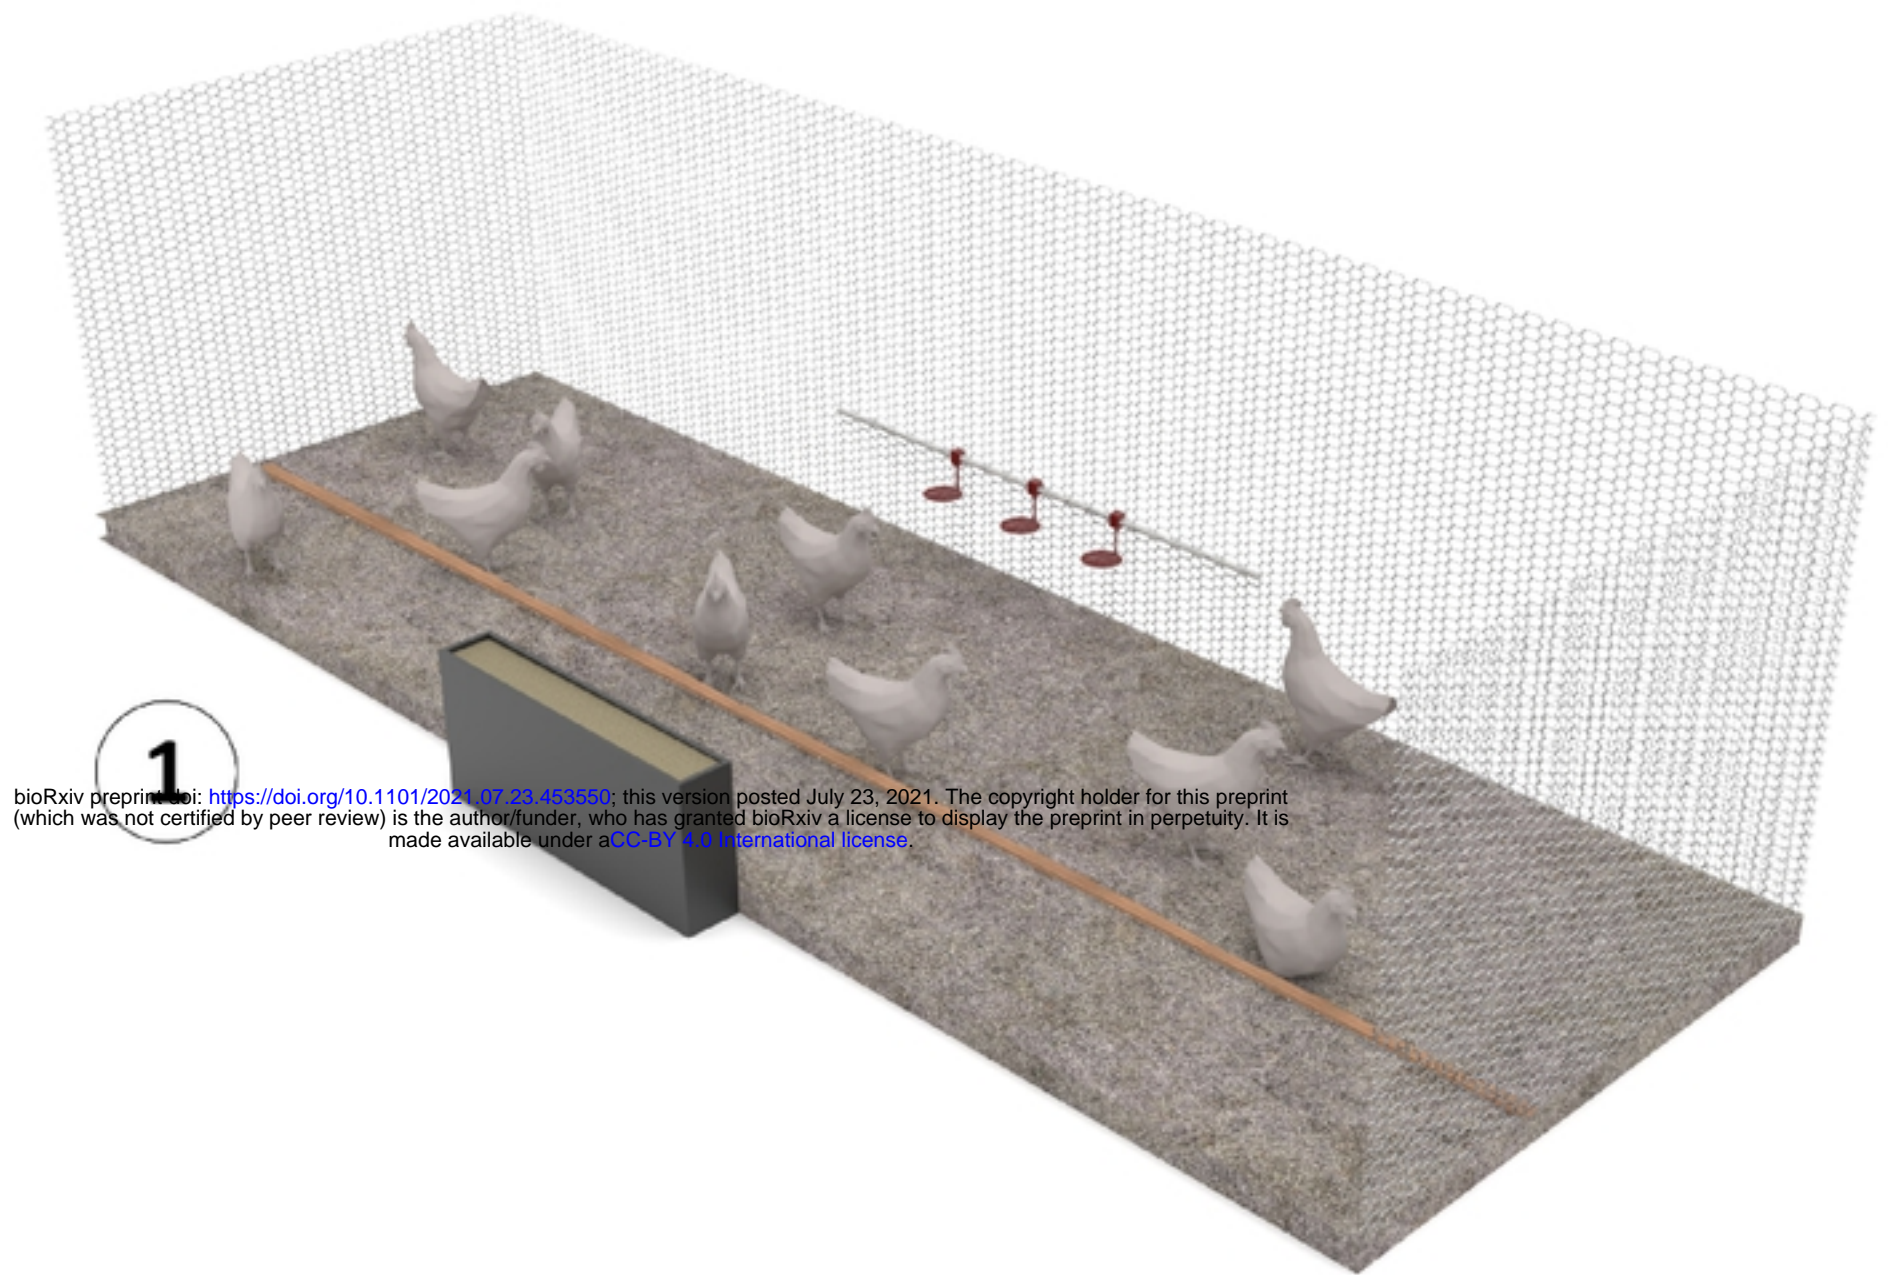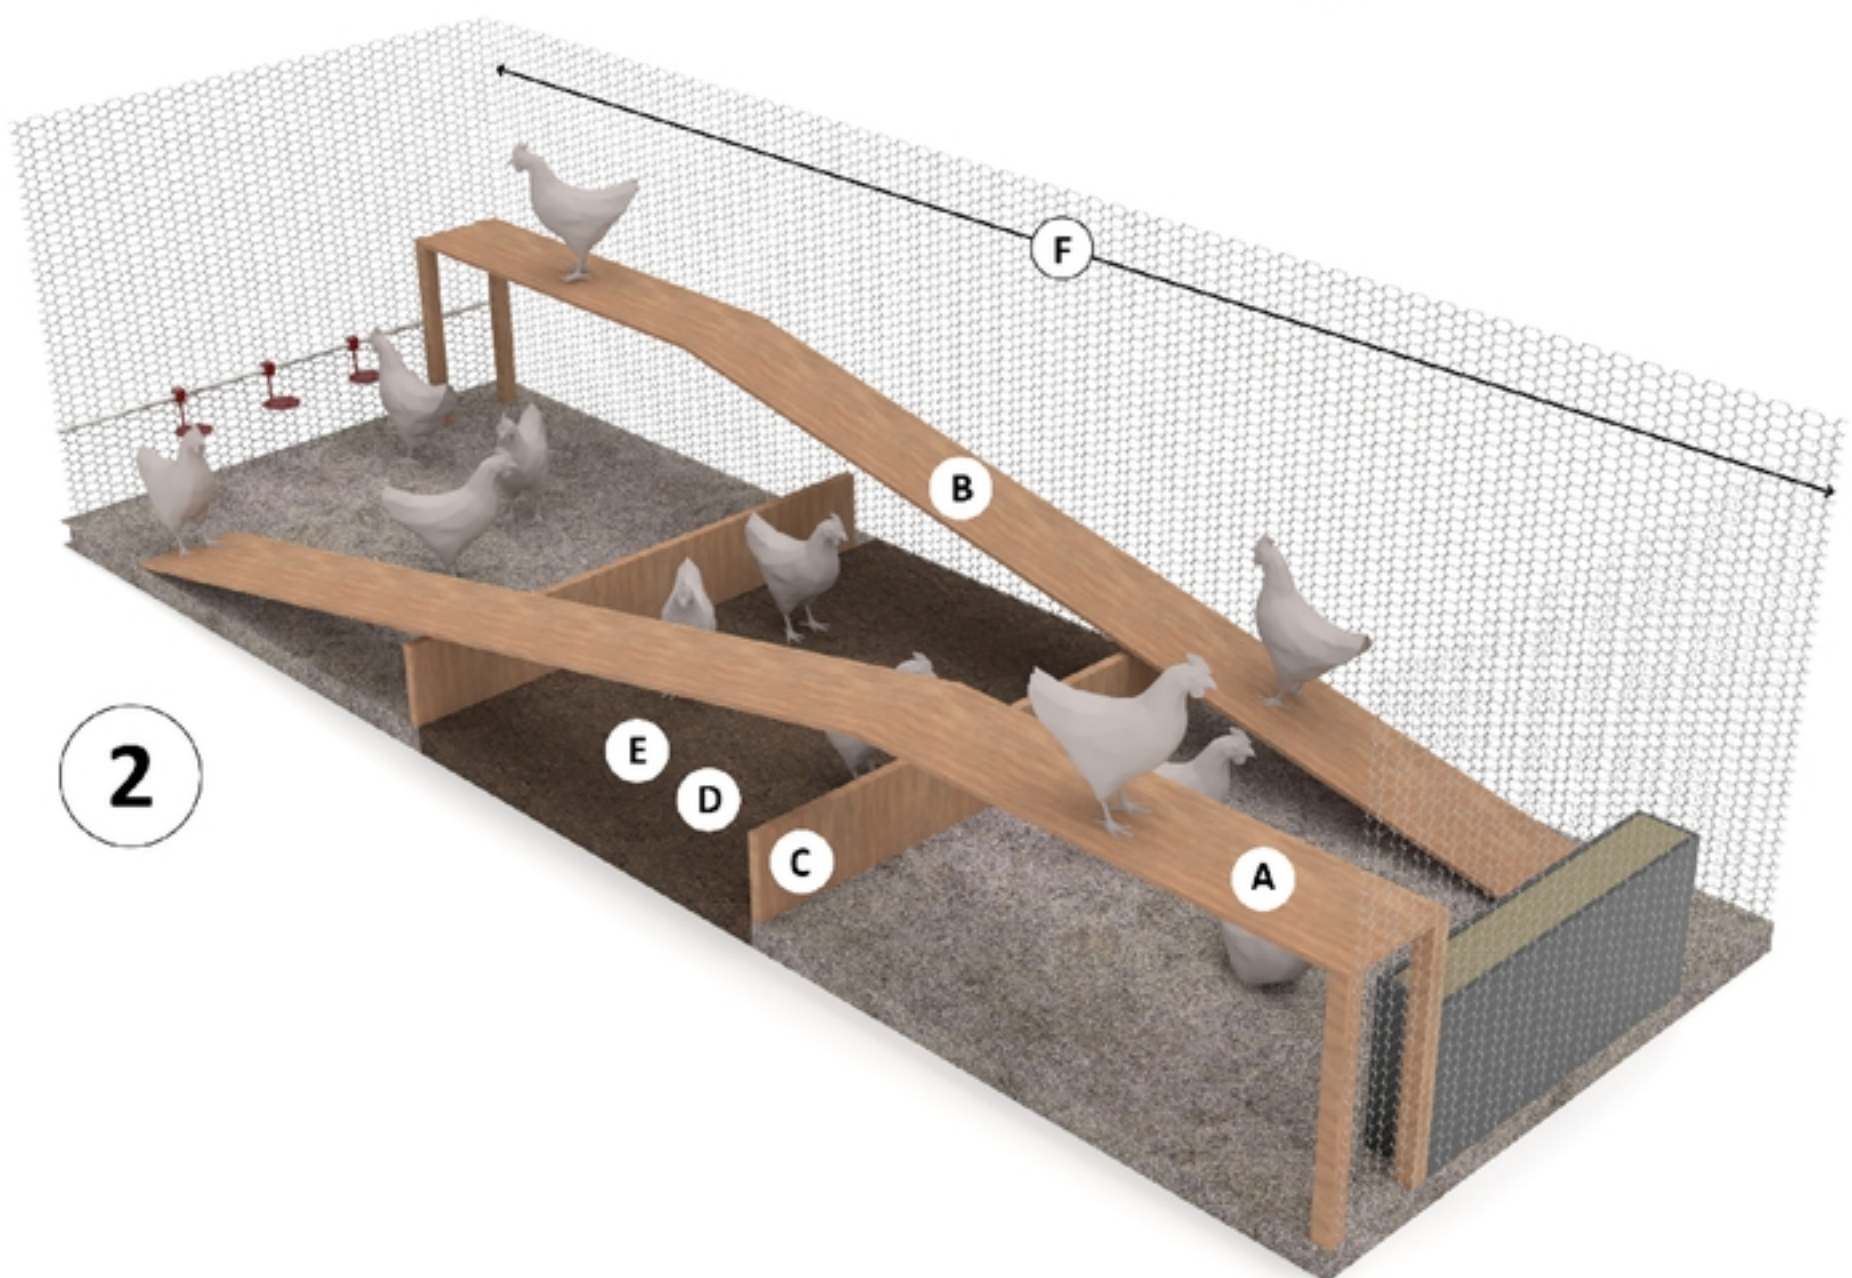

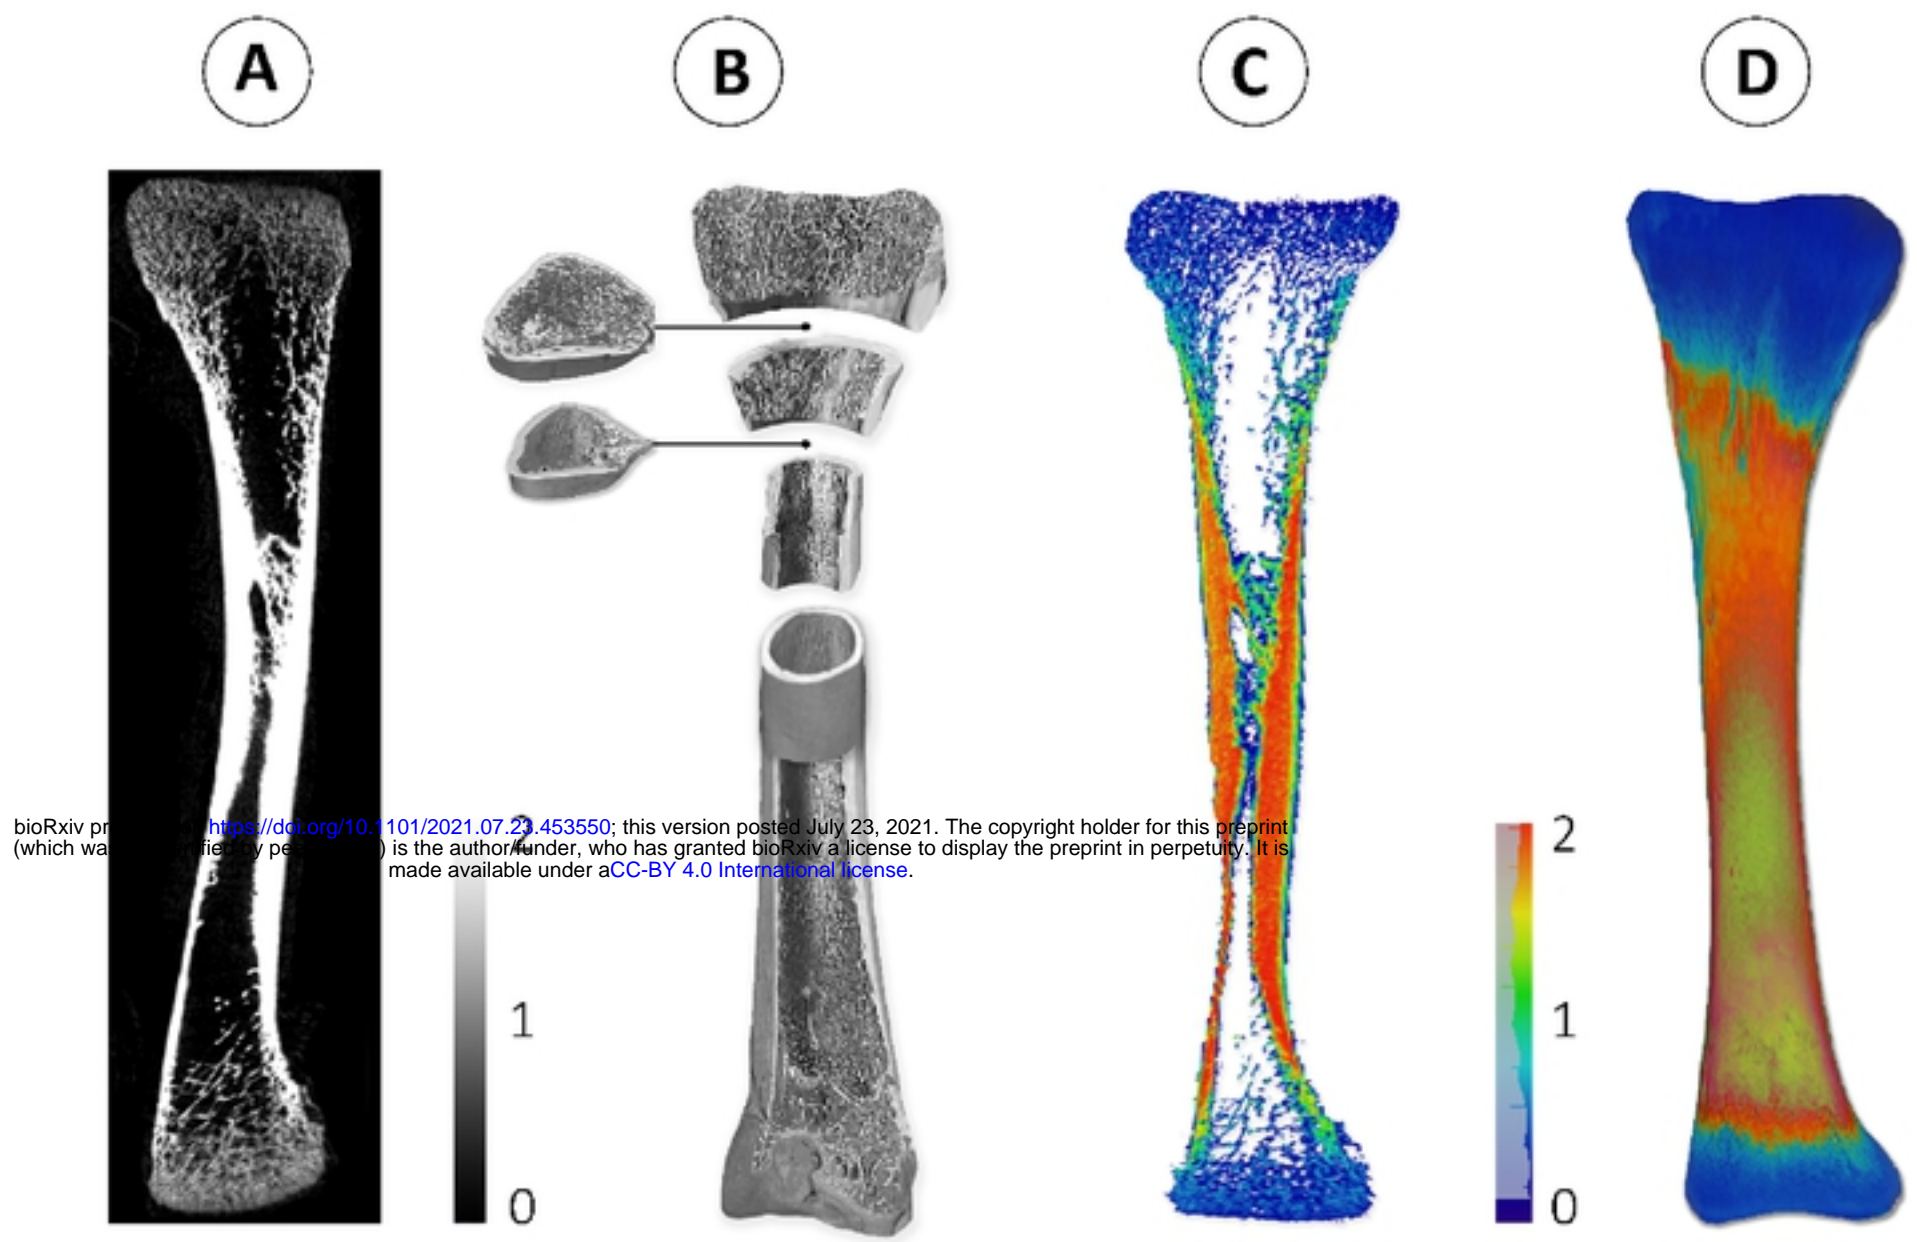

Source: http://biorxiv.org/content/10.1101/2021.07.23.453550v1.full.pdf
